# Supplementary material
Source: PubMed Central journal article supplement (PMC4566260)
Supplement: 10.1534_115.176628_genetics.115.176628-1.pdf [file 10.1534_115.176628_genetics.115.176628-1.pdf]

Bowman MSIRSSGGSGGGQTSQMMAFSEHSLPKPIAGHPQPQSPSPSSERPA PRGRRRAQEPG 60  
Irregular spike 25 MSIRSSGGSGGGQTSQMMAFSEHSLPKPIAGHPQPQSPSPSSERPA PRGRRRAQEPG 60  
Foma MSIRSSGGSGGGQTSQMMAFSEHSLPKPIAGHPQPQSPSPSSERPA PRGRRRAQEPG 60  
Donaria MSIRSSGGSGGGQTSQMMAFSEHSLPKPIAGHPQPQSPSPSSERPA PRGRRRAQEPG 60  
Morex MSIRSSGGSGGGQTSQMMAFSEHSLPKPIAGHPQPQSPSPSSERPA PRGRRRAQEPG 60  
Optic MSIRSSGGSGGGQTSQMMAFSEHSLPKPIAGHPQPQSPSPSSERPA PRGRRRAQEPG 60  
Haruna Nijo MSIRSSGGSGGGQTSQMMAFSEHSLPKPIAGHPQPQSPSPSSERPA PRGRRRAQEPG 60  
brcl.5 MSIRSSGGSGGGQTSQMMAFSEHSLPKPIAGHPQPQSPSPSSERPA PRGRRRAQEPG 60  
com2.k MSIRSSGGSGGGQTSQMMAFSEHSLPKPIAGHPQPQSPSPSSERPA PRGRRRAQEPG 60  
Freak MSIRSSGGSGGGQTSQMMAFSEHSLPKPIAGHPQPQSPSPSSERPA PRGRRRAQEPG 60  
HOR14427 MSIRSSGGSGGGQTSQMMAFSEHSLPKPIAGHPQPQSPSPSSERPA PRGRRRAQEPG 60  
BM-NIL (BW192)com2.g MSIRSSGGSGGGQTSQMMAFSEHSLPKPIAGHPQPQSPSPSSERPA PRGRRRAQEPG 60  
\*\*\*\*\*

Bowman RFLGVRRRPWGRYAAEIRDPTTKERHWLGTFTDQEAALAYDRAALS MKGAQARTNFVYA 120  
Irregular spike 25 RFLGVRRRPWGRYAAEIRDPTTKERHWLGTFTDQEAALAYDRAALS MKGAQARTNFVYA 120  
Foma RFLGVRRRPWGRYAAEIRDPTTKERHWLGTFTDQEAALAYDRAALS MKGAQARTNFVYA 120  
Donaria RFLGVRRRPWGRYAAEIRDPTTKERHWLGTFTDQEAALAYDRAALS MKGAQARTNFVYA 120  
Morex RFLGVRRRPWGRYAAEIRDPTTKERHWLGTFTDQEAALAYDRAALS MKGAQARTNFVYA 120  
Optic RFLGVRRRPWGRYAAEIRDPTTKERHWLGTFTDQEAALAYDRAALS MKGAQARTNFVYA 120  
Haruna Nijo RFLGVRRRPWGRYAAEIRDPTTKERHWLGTFTDQEAALAYDRAALS MKGAQARTNFVYA 120  
brcl.5 RFLGVRRRPWGRYAAEIRDPTTKERHWLGTFTDQEAALAYDRAALS MKGAQARTNFVYA 120  
com2.k RFLGVRRRPWGRYAAEIRDPTTKERHWLGTFTDQEAALAYDRAALS MKGAQARTNFVYA 120  
Freak RFLGVRRRPWGRYAAEIRDPTTKERHWLGTFTDQEAALAYDRAALS MKGAQARTNFVYA 120  
HOR14427 RFLGVRRRPWGRYAAEIRDPTTKERHWLGTFTDQEAALAYDRAALS MKGAQARTNFVYA 120  
BM-NIL BW192com2.g RFLGVRRRPWGRYAAEIRDPTTKERHWLGTFTDQEAALAYDRAALS MKGAQARTNFVYA 120  
\*\*\*\*\*

Bowman HAA YNNYPPFLAPFHAQPAYASSTMPYGGQHQHAGAAPPHIGSYHSHGCVGYHQGGPAGA 180  
Irregular spike 25 HAA YNNYPPFLAPFHAQPAYASSTMPYGGQHQHAGAAPPHIGSYHSHGCVGYHQGGPAGA 180  
Foma HAA YNNYPPFLAPFHAQPAYASSTMPYGGQHQHAGAAPPHIGSYHSHGCVGYHQGGPAGA 180  
Donaria HAA YNNYPPFLAPFHAQPAYASSTMPYGGQHQHAGAAPPHIGSYHSHGCVGYHQGGPAGA 180  
Morex HAA YNNYPPFLAPFHAQPAYASSTMPYGGQHQHAGAAPPHIGSYHSHGCVGYHQGGPAGA 180  
Optic HAA YNNYPPFLAPFHAQPAYASSTMPYGGQHQHAGAAPPHIGSYHSHGCVGYHQGGPAGA 180  
Haruna Nijo HAA YNNYPPFLAPFHAQPAYASSTMPYGGQHQHAGAAPPHIGSYHSHGCVGYHQGGPAGA 180  
brcl.5 HAA YNNYPPFLAPFHAQPAYASSTMPYGGQHQHAGAAPPHIGSYHSHGCVGYHQGGPAGA 180  
com2.k HAA YNNYPPFLAPFHAQPAYASSTMPYGGQHQHAGAAPPHIGSYHSHGCVGYHQGGPAGA 180  
Freak HAA YNNYPPFLAPFHAQPAYASSTMPYGGQHQHAGAAPPHIGSYHSHGCVGYHQGGPAGA 180  
HOR14427 HAA YNNYPPFLAPFHAQPAYASSTMPYGGQHQHAGAAPPHIGSYHSHGCVGYHQGGPAGA 180  
BM-NIL BW192com2.g HAA YNNYPPFLAPFHAQPAYASSTMPYGGQHQHAGAAPPHIGSYHSHGCVGYHQGGPAGA 180  
\*\*\*\*\*

(L228H)

Bowman GECSMPV PNAADHAAS PMDVRS SSGHDFLFP SADDNSGYLS SVVPE SCLRPRGGDLQDARR 240  
Irregular spike 25 GECSMPV PNAADHAAS PMDVRS SSGHDFLFP SADDNSGYLS SVVPE SC~~R~~PRGGDLQDARR 240  
Foma GECSMPV PNAADHAAS PMDVRS SSGHDFLFP SADDNSGYLS SVVPE SCLRPRGGDLQDARR 240  
Donaria GECSMPV PNAADHAAS PMDVRS SSGHDFLFP SADDNSGYLS SVVPE SCLRPRGGDLQDARR 240  
Morex GECSMPV PNAADHAAS PMDVRS SSGHDFLFP SADDNSGYLS SVVPE SCLRPRGGDLQDARR 240  
Optic GECSMPV PNAADHAAS PMDVRS SSGHDFLFP SADDNSGYLS SVVPE SCLRPRGGDLQDARR 240  
Haruna Nijo GECSMPV PNAADHAAS PMDVRS SSGHDFLFP SADDNSGYLS SVVPE SCLRPRGGDLQDARR 240  
brcl.5 GECSMPV PNAADHAAS PMDVRS SSGHDFLFP SADDNSGYLS ~~R~~VVPE SCLRPRGGDLQDARR 240  
com2.k GECSMPV PNAADHAAS PMDVRS SSGHDFLFP SADDNSGYLS ~~R~~VVPE SCLRPRGGDLQDARR 240  
Freak GECSMPV PNAADHAAS PMDVRS SSGHDFLFP SADDNSGYLS ~~R~~VVPE SCLRPRGGDLQDARR 240  
HOR14427 GECSMPV PNAADHAAS PMDVRS SSGHDFLFP SADDNSGYLS ~~R~~VVPE SCLRPRGGDLQDARR 240  
BM-NIL BW192 com2.g GECSMPV PNAADHAAS PMDVRS SSGHDFLFP SADDNSGYLS ~~R~~VVPE SCLRPRGGDLQDARR 240  
\*\*\*\*\*

(S221R)

Bowman YSVSDADAYGLGLREDVDDLAS MVAGFWGGADAA YGGFAPANGGGHDMVAS SQGSDNGYS 300  
Irregular spike 25 YSVSDADAYGLGLREDVDDLAS MVAGFWGGADAA YGGFAPANGGGHDMVAS SQGSDNGYS 300  
Foma YSVSDADAYGLGLREDVDDLAS MVAGFWGGADAA YGGFAPANGGGHDMVAS SQGSDNGYS 300  
Donaria YSVSDADAYGLGLREDVDDLAS MVAGFWGGADAA YGGFAPANGGGHDMVAS SQGSDNGYS 300  
Morex YSVSDADAYGLGLREDVDDLAS MVAGFWGGADAA YGGFAPANGGGHDMVAS SQGSDNGYS 300  
Optic YSVSDADAYGLGLREDVDDLAS MVAGFWGGADAA YGGFAPANGGGHDMVAS SQGSDNGYS 300  
Haruna Nijo YSVSDADAYGLGLREDVDDLAS MVAGFWGGADAA YGGFAPANGGGHDMVAS SQGSDNGYS 300  
brcl.5 YSVSDADAYGLGLREDVDDLAS MVAGFWGGADAA YGGFAPANGGGHDMVAS SQGSDNGYS 287  
com2.k YSVSDADAYGLGLREDVDDLAS MVAGFWGGADAA YGGFAPANGGGHDMVAS SQGSDNGYS 300  
Freak YSVSDADAYGLGLREDVDDLAS MVAGFWGGADAA YGGFAPANGGGHDMVAS SQGSDNGYS 300  
HOR14427 YSVSDADAYGLGLREDVDDLAS MVAGFWGGADAA YGGFAPANGGGHDMVAS SQGSDNGYS 300  
BM-NIL BW192com2.g YSVSDADAYGLGLREDVDDLAS MVAGFWGGADAA YGGFAPANGGGHDMVAS SQGSDNGYS 300  
\*\*\*\*\*

Bowman PFSFLSH 307  
Irregular spike 25 PFSFLSH 307  
Foma PFSFLSH 307  
Donaria PFSFLSH 307  
Morex PFSFLSH 307  
Optic PFSFLSH 307  
Haruna Nijo PFSFLSH 307  
brcl.5 PFSFLSH 307  
com2.k PFSFLSH 307  
Freak PFSFLSH 307  
HOR14427 PFSFLSH 307  
BM-NIL BW192com2.g PFSFLSH 307

**Figure S3 COM2 protein sequence alignment of different mutant alleles:** Mutated positions between parents of the population BW-NIL(*com2.g*) and Haruna Nijo as well as other identified mutants that either shared the same mutation observed in the mutant parent of *com2.g* (S221R) (four mutants; *brc1.5*, *com.k*, Freak , HOR14427) or showed a different mutation (L228H) (one mutant; the *irregular spike 25*). The remaining cultivars represent the donor lines; see Table S1.
