# Supplementary material
Source: PubMed Central journal article supplement (PMC4566260)
Supplement: 10.1534_115.176628_genetics.115.176628-2.pdf [file 10.1534_115.176628_genetics.115.176628-2.pdf]

**Table S2 Different barley TILLING plants and the corresponding positions of different amino acid substitution.**

| Mutant ID                                | population | SNP position | SNP | SNP allele   | aa substitution | Domain position       | Conservation     |
|------------------------------------------|------------|--------------|-----|--------------|-----------------|-----------------------|------------------|
| 10782-1                                  | Barke      | 151          | C→T | Heterozygote | R → C           | -                     | -                |
| 10607-1                                  | Barke      | 155          | G→A | Heterozygote | G → D           | -                     | -                |
| 12171-1                                  | Barke      | 176          | C→T | Heterozygote | P → L           | -                     | conserved region |
| 2723-1                                   | Barke      | 308          | G→A | Homozygote   | R → H           | within AP2/ERF domain | conserved region |
| 3919-1                                   | Barke      | 320          | C→T | Heterozygote | S → F           | within AP2/ERF domain | conserved region |
| 6816-1                                   | Barke      | 529          | G→A | Homozygote   | G → S           | -                     | -                |
| 11023-1                                  | Barke      | 541          | G→A | Homozygote   | G → S           | -                     | -                |
| 11359-1                                  | Barke      | 572          | C→T | Homozygote   | A → V           | -                     | -                |
| 4913-1                                   | Barke      | 587          | G→A | Homozygote   | S → N           | -                     | -                |
| 13679-2                                  | Barke      | 605          | G→A | Homozygote   | S → N           | -                     | -                |
| 6872-1                                   | Barke      | 631          | A→T | Homozygote   | S → C           | -                     | -                |
| 9662-1                                   | Barke      | 662          | G→A | Homozygote   | S → N           | -                     | conserved region |
| 6893-1                                   | Barke      | 695          | G→A | Homozygote   | G → D           | -                     | -                |
| 9624-1                                   | Barke      | 748          | G→T | Heterozygote | G → W           | -                     | -                |
| 48                                       | Morex      | 329          | G→A | Heterozygote | G → D (110)     | within AP2/ERF domain | conserved region |
| 5865                                     | Morex      | 286          | G→A | Homozygote   | E → K (96)      | within AP2/ERF domain | conserved region |
| AP2/ERF domain                           |            |              |     | 184 - 357 bp |                 |                       |                  |
| phylogenetically highly conserved domain |            |              |     | 638 - 691 bp |                 |                       |                  |
