# Supplementary material
Source: PubMed Central journal article supplement (PMC4566260)
Supplement: 10.1534_115.176628_genetics.115.176628-3.pdf [file 10.1534_115.176628_genetics.115.176628-3.pdf]

**Table S4 Tetraploid ‘Miracle Wheat’ used for allelism test and the corresponding F<sub>1</sub> phenotype.**

| Cross    |   |          | Resulted Progeny | plant number | spikes per plant | branched spikes    |
|----------|---|----------|------------------|--------------|------------------|--------------------|
| Tri 3261 | * | Tri 9652 | plant 1          | XIX-2012-1   | 3                | 1                  |
| Tri 3261 | * | Tri 9652 | plant 2          | XIX-2012-2   | 3                | no branched spikes |
| Tri 3261 | * | Tri 9652 | plant 3          | XIX-2012-3   | 2                | 2                  |
| Tri 3261 | * | Tri 9652 | plant 4          | XIX-2012-4   | 4                | 3                  |
| Tri 3261 | * | Tri 9652 | plant 5          | XIX-2012-5   | 2                | 2                  |
| Tri 3261 | * | Tri 9652 | plant 6          | XIX-2012-6   | 2                | 2                  |
| Tri 3261 | * | Tri 9652 | plant 7          | XIX-2012-7   | 4                | 4                  |
| Tri 3261 | * | Tri 9652 | plant 8          | XIX-2012-8   | 3                | 3                  |
| Tri 3261 | * | Tri 9652 | plant 9          | XIX-2012-9   | 3                | 3                  |
| Tri 3261 | * | Tri 9652 | plant 10         | XIX-2012-10  | 3                | 3                  |
| Tri 9652 | * | Tri 3261 | plant 1          | XIX-2012-11  | 4                | 4                  |
| Tri 9652 | * | Tri 3261 | plant 2          | XIX-2012-12  | 2                | 2                  |
| Tri 9652 | * | Tri 3261 | plant 3          | XIX-2012-13  | 3                | 3                  |
| Tri 9652 | * | Tri 3261 | plant 4          | XIX-2012-14  | 3                | 2                  |
| Tri 9652 | * | Tri 3261 | plant 5          | XIX-2012-15  | 3                | 3                  |
| Tri 9652 | * | Tri 3261 | plant 6          | XIX-2012-16  | 3                | 3                  |
| Tri 9652 | * | Tri 3261 | plant 7          | XIX-2012-17  | 4                | 4                  |
| Tri 9652 | * | Tri 3261 | plant 8          | XIX-2012-18  | 2                | 2                  |
| Tri 9652 | * | Tri 5283 | plant 1          | XIX-2012-22  | 2                | 2                  |
| Tri 9652 | * | Tri 5283 | plant 2          | XIX-2012-23  | 2                | 2                  |
| Tri 9652 | * | Tri 5283 | plant 3          | XIX-2012-24  | 3                | 3                  |
| Tri 9652 | * | Tri 5283 | plant 4          | XIX-2012-25  | 4                | 3                  |
| Tri 9652 | * | Tri 5283 | plant 5          | XIX-2012-26  | 4                | 4                  |
| Tri 9652 | * | Tri 5283 | plant 6          | XIX-2012-27  | 3                | 3                  |
| Tri 9652 | * | Tri 5283 | plant 7          | XIX-2012-28  | 3                | 3                  |
| Tri 9652 | * | Tri 5283 | plant 8          | XIX-2012-29  | 3                | 3                  |
| Tri 9652 | * | Tri 5283 | plant 2          | XIX-2012-31  | 3                | 2                  |
| Tri 9652 | * | Tri 5283 | plant 3          | XIX-2012-32  | 3                | 3                  |
| Tri 9652 | * | Tri 5283 | plant 4          | XIX-2012-33  | 3                | 3                  |
| Tri 3261 | * | Tri 5283 | plant 1          | XIX-2012-34  | 3                | 3                  |
| Tri 3261 | * | Tri 5283 | plant 2          | XIX-2012-35  | 3                | 3                  |
| Tri 3261 | * | Tri 5283 | plant 3          | XIX-2012-36  | 5                | 5                  |
| Tri 3261 | * | Tri 5283 | plant 4          | XIX-2012-37  | 3                | 3                  |
| Tri 3261 | * | Tri 5283 | plant 5          | XIX-2012-38  | 3                | 3                  |
| Tri 984  | * | Tri 5283 | plant 1          | XIX-2012-39  | 4                | 3                  |
