# Supplementary material
Source: PubMed Central journal article supplement (PMC4566260)
Supplement: 10.1534_115.176628_genetics.115.176628-4.pdf [file 10.1534_115.176628_genetics.115.176628-4.pdf]

SI FIGURES

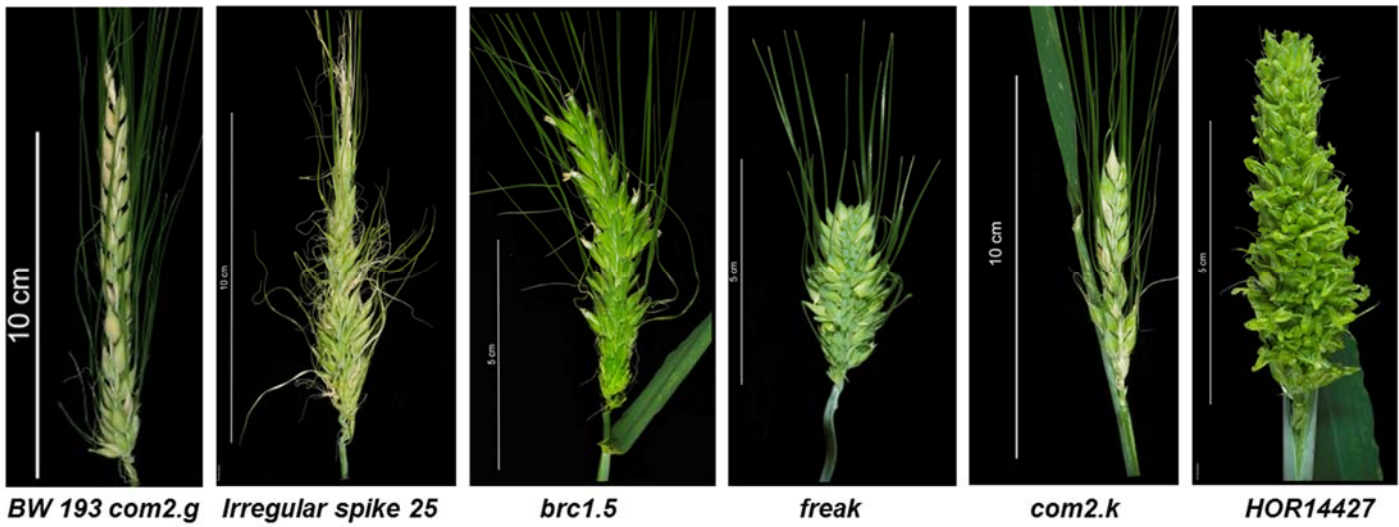

**Figure S1 Additional mutant alleles of spike branching in barley.** Different *com2* mutant alleles identified by resequencing of the *COM2* ORF region. The *irregular spike25* mutant shows a higher degree of spikelet infertility. *HOR14427* is a double mutant of *com2*/hooded, see Table S1.
