# Supplementary material
Source: PubMed Central journal article supplement (PMC4566260)
Supplement: 10.1534_115.176628_genetics.115.176628-6.pdf [file 10.1534_115.176628_genetics.115.176628-6.pdf]

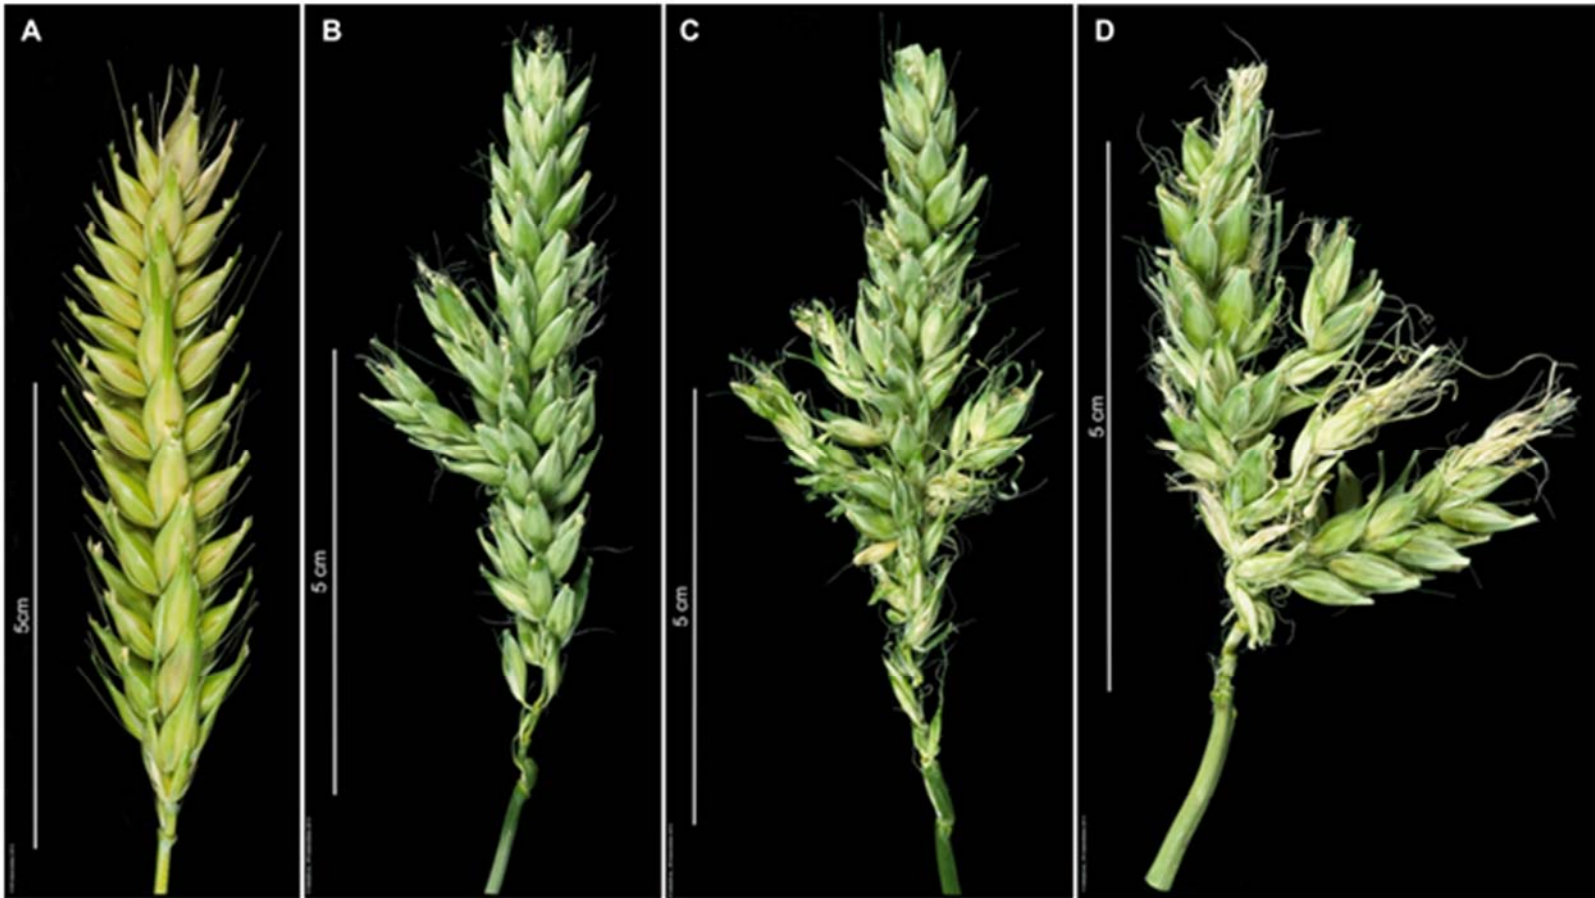

**Figure S6 Branch formation in *vrs4* mutant (*mul1.a*).** (A) Mature spike of wild type progenitor cv. Montcalm with determinate triple spikelet meristem. (B-D) Mature spikes of *vrs4* mutant MC (*mul1.a*) showing various levels of branch proliferation at the spike base and middle portion of the spike.
