# Supplementary material
Source: PubMed Central journal article supplement (PMC4566260)
Supplement: 10.1534_115.176628_genetics.115.176628-9.pdf [file 10.1534_115.176628_genetics.115.176628-9.pdf]

**Table S5 Mutant and wild type Tetraploid ‘Miracle Wheat’ accessions used for resequencing of the *bh<sup>1</sup>* locus.**

| Tt-WheatID | Country of origin | Growth habit | Spike type | A genome                            |                                                              |
|------------|-------------------|--------------|------------|-------------------------------------|--------------------------------------------------------------|
|            |                   |              |            | SNP (T287C; Tamaroi45 as Reference) | corresponding aa substitution (L96P; Tamaroi45 as Reference) |
| KALKA      | AUS               | spring type  | Wild type  | Not Found                           | Not Found                                                    |
| BELLAROI   | AUS               | spring type  | Wild type  | Not Found                           | Not Found                                                    |
| TAMAROI    | AUS               | spring type  | Wild type  | Not Found                           | Not Found                                                    |
| FLORADUR   | AUT               | spring type  | Wild type  | Not Found                           | Not Found                                                    |
| WOLLAROI   | AUS               | spring type  | Wild type  | Not Found                           | Not Found                                                    |
| TRI11066   | UZB               | spring type  | Wild type  | Not Found                           | Not Found                                                    |
| TRI17236   | TUR               | spring type  | Wild type  | Not Found                           | Not Found                                                    |
| TRI2230    | USA               | spring type  | Wild type  | Not Found                           | Not Found                                                    |
| TRI3504    | POR               | spring type  | Wild type  | Not Found                           | Not Found                                                    |
| TRI758     | TUR               | spring type  | Wild type  | Not Found                           | Not Found                                                    |
| TD24       | GER               | winter type  | Wild type  | Not Found                           | Not Found                                                    |
| TD97       | GER               | winter type  | Wild type  | Not Found                           | Not Found                                                    |
| AURADUR    | AUT               | winter type  | Wild type  | Not Found                           | Not Found                                                    |
| LOGIDUR    | AUT               | winter type  | Wild type  | Not Found                           | Not Found                                                    |
| LUNADUR    | AUT               | winter type  | Wild type  | Not Found                           | Not Found                                                    |
| LUPIDUR    | AUT               | winter type  | Wild type  | Not Found                           | Not Found                                                    |
| ELSADUR    | AUT               | winter type  | Wild type  | Not Found                           | Not Found                                                    |
| TRI 13541  | ITA               | winter type  | Wild type  | Not Found                           | Not Found                                                    |
| TRI 1669   | ALB               | winter type  | Wild type  | Not Found                           | Not Found                                                    |
| TRI 19273  | TUR               | winter type  | Wild type  | Not Found                           | Not Found                                                    |
| TRI 3023   | ALB               | winter type  | Wild type  | Not Found                           | Not Found                                                    |
| TRI 3720   | ESP               | winter type  | Wild type  | Not Found                           | Not Found                                                    |
| TRI 4292   | TUR               | winter type  | Wild type  | Not Found                           | Not Found                                                    |
| TRI 4522   | CHN               | winter type  | Wild type  | Not Found                           | Not Found                                                    |
| TRI 4886   | UK                | winter type  | Wild type  | Not Found                           | Not Found                                                    |
| TRI 7021   | POL               | winter type  | Wild type  | Not Found                           | Not Found                                                    |
| TRI 7056   | FRA               | winter type  | Wild type  | Not Found                           | Not Found                                                    |
| TRI 9546   | ARM               | winter type  | Wild type  | Not Found                           | Not Found                                                    |
| TRI 9547   | ARM               | winter type  | Wild type  | Not Found                           | Not Found                                                    |
| TRI 9629   | CSFR              | winter type  | Wild type  | Not Found                           | Not Found                                                    |
| TRI 984    | EUR               | spring type  | Mutant     | Found as Homozygote                 | Found as Homozygote                                          |
| TRI 3261   | ESP               | spring type  | Mutant     | Found as Homozygote                 | Found as Homozygote                                          |
| TRI 5283   | CHN               | spring type  | Mutant     | Found as Homozygote                 | Found as Homozygote                                          |

|                     |      |              |        |                       |                       |
|---------------------|------|--------------|--------|-----------------------|-----------------------|
| TRI 18959           | FRA  | spring type? | Mutant | Found as Homozygote   | Found as Homozygote   |
| CITr 13712          | USA  | spring type  | Mutant | Found as Homozygote   | Found as Homozygote   |
| CITr 13713          | USA  | spring type  | Mutant | Found as Homozygote   | Found as Homozygote   |
| PI 225308           | IRAN | spring type  | Mutant | Found as Homozygote   | Found as Homozygote   |
| PI 349056           | ARM  | spring type  | Mutant | Found as Homozygote   | Found as Homozygote   |
| PI 438971           | KAZ  | spring type  | Mutant | Found as Homozygote   | Found as Homozygote   |
| TRI 3411            | SU   | spring type  | Mutant | Found as Homozygote   | Found as Homozygote   |
| TRI 4045            | EUR  | spring type  | Mutant | Found as Homozygote   | Found as Homozygote   |
| TRI 4341            | EUR  | spring type  | Mutant | Found as Homozygote   | Found as Homozygote   |
| TRI 5911            | IRAN | spring type  | Mutant | Found as Homozygote   | Found as Homozygote   |
| TRI 9548;W1420      | ARM  | spring type  | Mutant | Found as Homozygote   | Found as Homozygote   |
| TRI 27966           | -    | spring type  | Mutant | Found as Homozygote   | Found as Homozygote   |
| TRI 1781            | GER  | winter type  | Mutant | Found as Homozygote   | Found as Homozygote   |
| TRI 1782            | GER  | winter type  | Mutant | Found as Homozygote   | Found as Homozygote   |
| TRI 3365            | CHN  | winter type  | Mutant | Found as Homozygote   | Found as Homozygote   |
| TRI 4270            | ITA  | winter type  | Mutant | Found as Homozygote   | Found as Homozygote   |
| TRI 4446            | HUN  | winter type  | Mutant | Found as Homozygote   | Found as Homozygote   |
| TRI 4461            | EUR  | winter type  | Mutant | Found as Homozygote   | Found as Homozygote   |
| TRI 4653            | AUS  | winter type  | Mutant | Found as Homozygote   | Found as Homozygote   |
| TRI 9628;<br>;W1529 | IND  | winter type  | Mutant | Found as Homozygote   | Found as Homozygote   |
| TRI 19165           | -    | winter type  | Mutant | Found as Homozygote   | Found as Homozygote   |
| TRI 19292           | FRA  | winter type  | Mutant | Found as Homozygote   | Found as Homozygote   |
| TRI 28396           | ITA  | winter type  | Mutant | Found as Homozygote   | Found as Homozygote   |
| TRI 24012           | -    | winter type  | Mutant | Found as Heterozygote | Found as Heterozygote |
| TRI 4448            | EUR  | winter type  | Mutant | Found as Heterozygote | Found as Heterozygote |
| TRI 9652;W1554      | CSR  | spring type  | Mutant | Found as Heterozygote | Found as Heterozygote |
