# Supplementary material
Source: PubMed Central journal article supplement (PMC4566260)
Supplement: 10.1534_115.176628_genetics.115.176628-12.pdf [file 10.1534_115.176628_genetics.115.176628-12.pdf]

Table S3 Barley accessions used for *COM2* haplotype detection and the respective haplotype identified

| Accession ID                          | 216bp | 300bp | 414bp | 494bp | 536bp | 642bp | 663bp | 696bp | 822bp | 873bp   | Haplotype category |
|---------------------------------------|-------|-------|-------|-------|-------|-------|-------|-------|-------|---------|--------------------|
| MUT2201 com2.f                        | G     | C     | C     | C     | G     | C     | C     | C     | A     | MISSING | ?                  |
| GM 1E Nudinka                         | G     | C     | C     | C     | G     | C     | C     | C     | A     | A       | I                  |
| GM713 Morex                           | G     | C     | C     | C     | G     | C     | C     | C     | A     | A       | I                  |
| GM712 Donaria                         | G     | C     | C     | C     | G     | C     | C     | C     | A     | A       | I                  |
| Haruna Nijo                           | G     | C     | C     | C     | G     | C     | C     | C     | A     | A       | I                  |
| Barke                                 | G     | C     | C     | C     | G     | C     | C     | C     | A     | A       | I                  |
| 3167                                  | G     | C     | C     | C     | G     | C     | C     | C     | A     | A       | I                  |
| 3906                                  | G     | C     | C     | C     | G     | C     | C     | C     | A     | A       | I                  |
| GM 504 vulg. hybernum vikayarvi       | G     | C     | C     | C     | G     | C     | C     | C     | A     | A       | I                  |
| GM 505 vulg. hybernum tystofte korsby | G     | C     | C     | C     | G     | C     | C     | C     | A     | A       | I                  |
| GM 506 vulg. parallelum montafon      | G     | C     | C     | C     | G     | C     | C     | C     | A     | A       | I                  |
| GM 507 vulg. parallelum sechszeilige  | G     | C     | C     | C     | G     | C     | C     | C     | A     | A       | I                  |
| GM 508 vulg. hybernum arrecife        | G     | C     | C     | C     | G     | C     | C     | C     | A     | A       | I                  |
| GM 511 vulg. hybernum poliarnyj 14    | G     | C     | C     | C     | G     | C     | C     | C     | A     | A       | I                  |
| GM 513 vulg. hybernum oberbrucker     | G     | C     | C     | C     | G     | C     | C     | C     | A     | A       | I                  |
| GM 516 vulg. subviolaceum abessinien  | G     | C     | C     | C     | G     | C     | C     | C     | A     | A       | I                  |
| GM 527 dist. nutans sarah             | G     | C     | C     | C     | G     | C     | C     | C     | A     | A       | I                  |
| GM 528 dist. nutans loosdorfer        | G     | C     | C     | C     | G     | C     | C     | C     | A     | A       | I                  |
| GM 529 dist. nutans proskowetz gerste | G     | C     | C     | C     | G     | C     | C     | C     | A     | A       | I                  |
| GM 530 dist. nutans triumf            | G     | C     | C     | C     | G     | C     | C     | C     | A     | A       | I                  |
| GM 531 dist. nutans carbonera         | G     | C     | C     | C     | G     | C     | C     | C     | A     | A       | I                  |
| GM 532 dist. nutans martonvasari      | G     | C     | C     | C     | G     | C     | C     | C     | A     | A       | I                  |
| GM 533 dist. nutans saratov           | G     | C     | C     | C     | G     | C     | C     | C     | A     | A       | I                  |
| GM 537 dist. erectum hokudai no. 1    | G     | C     | C     | C     | G     | C     | C     | C     | A     | A       | I                  |
| GM 542 vulg. hybernum lyallpur        | G     | C     | C     | C     | G     | C     | C     | C     | A     | A       | I                  |
| GM 543 vulg. wisconsin H42 (linie)    | G     | C     | C     | C     | G     | C     | C     | C     | A     | A       | I                  |
| GM 550 fap1 2158 L                    | G     | C     | C     | C     | G     | C     | C     | C     | A     | A       | I                  |
| GM 558 dist. glabriectum sanalta      | G     | C     | C     | C     | G     | C     | C     | C     | A     | A       | I                  |
| GM 561 dist. nutans pfaelzer land     | G     | C     | C     | C     | G     | C     | C     | C     | A     | A       | I                  |
| GM 562 dist. nutans szekacs linie II  | G     | C     | C     | C     | G     | C     | C     | C     | A     | A       | I                  |
| GM 563 dist. nutans maiamana          | G     | C     | C     | C     | G     | C     | C     | C     | A     | A       | I                  |
| GM1050C brc1.5                        | G     | C     | C     | C     | G     | C     | A     | C     | A     | G       | II                 |
| GM1116 com2.g                         | G     | C     | C     | C     | G     | C     | A     | C     | A     | G       | II                 |
| GM1118 com2.g introg bow              | G     | C     | C     | C     | G     | C     | A     | C     | A     | G       | II                 |
| GM570 Optic                           | G     | C     | C     | C     | G     | C     | C     | C     | A     | G       | III                |
| GM 500 Wild agriocrithon              | G     | C     | C     | C     | G     | C     | C     | C     | A     | G       | III                |
| GM 518 vulg. trifurcatum aegypten     | G     | C     | C     | C     | G     | C     | C     | C     | A     | G       | III                |

|                                          |   |   |   |   |   |   |   |   |   |         |     |
|------------------------------------------|---|---|---|---|---|---|---|---|---|---------|-----|
| GM 545 fap1 ooo8a                        | G | C | C | C | G | C | C | C | A | G       | III |
| GM 548 fap1 2158 B                       | G | C | C | C | G | C | C | C | A | G       | III |
| GM 564 hexastichon hybernum abarik       | G | C | C | C | G | C | C | C | A | G       | III |
| GM1087 Bowman                            | G | A | G | G | G | C | C | T | A | G       | IV  |
| GM702 Bowman                             | G | A | G | G | G | C | C | T | A | G       | IV  |
| GM21 Proctor                             | G | A | G | G | G | C | C | T | A | G       | IV  |
| GM 569 Golden Promise                    | G | A | G | G | G | C | C | T | A | G       | IV  |
| BM-NIL-flo-a.5 (BW369)                   | G | A | G | G | G | C | C | T | A | G       | IV  |
| Igri                                     | G | A | G | G | G | C | C | T | A | MISSING | IV  |
| GM 502 sp11 085-50                       | G | A | G | G | G | C | C | T | A | G       | IV  |
| GM 503 vulg. coeleste kleine nachtgerste | G | A | G | G | G | C | C | T | A | G       | IV  |
| GM 514 vulg. hybernum estanzuela         | G | A | G | G | G | C | C | T | A | G       | IV  |
| GM 515 vulg. hybernum elses              | G | A | G | G | G | C | C | T | A | G       | IV  |
| GM 517 vulg. hybernum marokkanische      | G | A | G | G | G | C | C | T | A | G       | IV  |
| GM 519 vulg. hybernum algerian           | G | A | G | G | G | C | C | T | A | G       | IV  |
| GM 522 vulg. himalayense tibet           | G | A | G | G | G | C | C | T | A | G       | IV  |
| GM 523 vulg. horsfordianum weihenstephan | G | A | G | G | G | C | C | T | A | G       | IV  |
| GM 524 dist. nudiforcatum erfurt         | G | A | G | G | G | C | C | T | A | G       | IV  |
| GM 525 dist. nutans kenia                | G | A | G | G | G | C | C | T | A | G       | IV  |
| GM 526 dist. nutans spratt archer        | G | A | G | G | G | C | C | T | A | G       | IV  |
| GM 534 dist. nutans swannek              | G | A | G | G | G | C | C | T | A | G       | IV  |
| GM 535 dist. medicum anatolien           | G | A | G | G | G | C | C | T | A | G       | IV  |
| GM 536 dist. nigricans mandschurei       | G | A | G | G | G | C | C | T | A | G       | IV  |
| GM 538 dist. nutans australische fruche  | G | A | G | G | G | C | C | T | A | G       | IV  |
| GM 541 vulg. hybernum aegyptische        | G | A | G | G | G | C | C | T | A | G       | IV  |
| GM 546 dist. nutans bannerts             | G | A | G | G | G | C | C | T | A | G       | IV  |
| GM 547 fap 1 0266C                       | G | A | G | G | G | C | C | T | A | G       | IV  |
| GM 554 ucnw c177                         | G | A | G | G | G | C | C | T | A | G       | IV  |
| GM 555 npc 0006                          | G | A | G | G | G | C | C | T | A | G       | IV  |
| GM 556 siglah                            | G | A | G | G | G | C | C | T | A | G       | IV  |
| GM 557 siglah                            | G | A | G | G | G | C | C | T | A | G       | IV  |
| GM 560 dist. nutans agio                 | G | A | G | G | G | C | C | T | A | G       | IV  |
| GM 565 hexastichon hybernum chilean      | G | A | G | G | G | C | C | T | A | G       | IV  |
| GM 566 MPI 2                             | G | A | G | G | G | C | C | T | A | G       | IV  |
| GM 501 ucnw016                           | T | C | G | G | A | A | C | T | G | G       | V   |
| GM 509 vulg. nigroibericum otello        | T | C | G | G | A | A | C | T | G | G       | V   |
| GM 549 fap 1 2158 H                      | T | C | G | G | A | A | C | T | G | G       | V   |
| GM 540 deficiens steudelii abessinien    | T | C | G | G | A | A | C | T | G | G       | V   |
| GM 551 deficiens erythraeum foa II       | T | C | G | G | A | A | C | T | G | G       | V   |
| GM 559 deficiens deficiens fehlgerste    | T | C | G | G | A | A | C | T | G | G       | V   |

|                                                |              |   |   |   |   |   |   |   |   |   |     |
|------------------------------------------------|--------------|---|---|---|---|---|---|---|---|---|-----|
| <b>GM 539 intermedium gymnanomalum</b>         | T            | C | G | G | A | C | C | T | G | G | VI  |
| <b>GM 510 vulg. hybernum isthmos</b>           | G            | C | G | G | G | C | C | C | A | G | VII |
| <b>GM 512 vulg. rikotense brant</b>            | G            | C | G | G | G | C | C | C | A | G | VII |
| <b>GM 520 vulg. hybernum parallelum samsun</b> | G            | C | G | G | G | C | C | C | A | G | VII |
| <b>GM 521 vulg. parallelum libanon</b>         | G            | C | G | G | G | C | C | C | A | G | VII |
| <b>GM 544 ucnwc72a</b>                         | G            | C | G | G | G | C | C | C | A | G | VII |
| <b>GM 552 vulg. dundar-beyi nippon</b>         | G            | C | G | G | G | C | C | C | A | G | VII |
| <b>GM 553 intermedium horlani arlington</b>    | G            | C | G | G | G | C | C | C | A | G | VII |
| AP2/ERF domain                                 | 184 - 357 bp |   |   |   |   |   |   |   |   |   |     |
| phylogenetically highly conserved domain       | 638 - 691 bp |   |   |   |   |   |   |   |   |   |     |
