# Supplementary material
Source: PubMed Central journal article supplement (PMC4566260)
Supplement: 10.1534_115.176628_genetics.115.176628-13.pdf [file 10.1534_115.176628_genetics.115.176628-13.pdf]

SI TABLES

Table S1 Complementary information of the BW-NIL(*com2.g*) allelic mutants.

| Branched ( <i>compositum</i> ) Barleys | origin                                                                                                                                   |
|----------------------------------------|------------------------------------------------------------------------------------------------------------------------------------------|
| BW-NIL BW 192 ( <i>com2.g</i> )        | EMS or neutrons; branched spike; pedigree: BOWMAN *8/4/ 7.1 / 3ND8670 // ND7015 / CIM; <i>com2.g</i> allele                              |
| HOR 14427                              | according to M. Stanca: double mutant mk: m=branched/k=hooded; <i>m</i> and <i>k</i> old symbols, have to be <i>mul</i> and <i>Kap</i> : |
| FREAK                                  | dense branched ?? ; cv. Freak; 1961; <b>FREAK is not a cultivar but a selection of CIMMYT collection.</b>                                |
| <i>com.k</i>                           | spontaneous mutant probaly in Atlas (PI 539108) isolated by C.A. Suneson                                                                 |
| <i>Irregular spike 25</i>              | EMS; induced mutant in Foma (Clho 11333, <b>NGB 14659</b> ) isolated by U. Lundqvist                                                     |
| <i>brc1.5</i>                          | A naturally occurring variant in barley from the Braunschweig seed collection                                                            |
