# Supplementary material
Source: PubMed Central journal article supplement (PMC4566260)
Supplement: 10.1534_115.176628_genetics.115.176628-14.pdf [file 10.1534_115.176628_genetics.115.176628-14.pdf]

## SUPPORTING INFORMATION

### **The genetic basis of composite spike form in barley and 'Miracle-Wheat'**

Naser Poursarebani, Tina Seidensticker, Ravi Koppolu, Corinna Trautewig, Piotr Gawroński, Federica Bini, Twan Rutten, Shun Sakuma, Akemi Tagiri, Gizaw M. Wolde, Abdulhamit Battal, Stefano Ciannamea, Tiziana Fusca, Helmy M. Youssef, Thomas Nussbaumer, Carlo Pozzi, Andreas Börner, Udda Lundqvist, Takao Komatsuda, Silvio Salvi, Roberto Tuberosa, Cristobal Uauy, Nese Sreenivasulu, Laura Rossini, Thorsten Schnurbusch

SI FIGURES

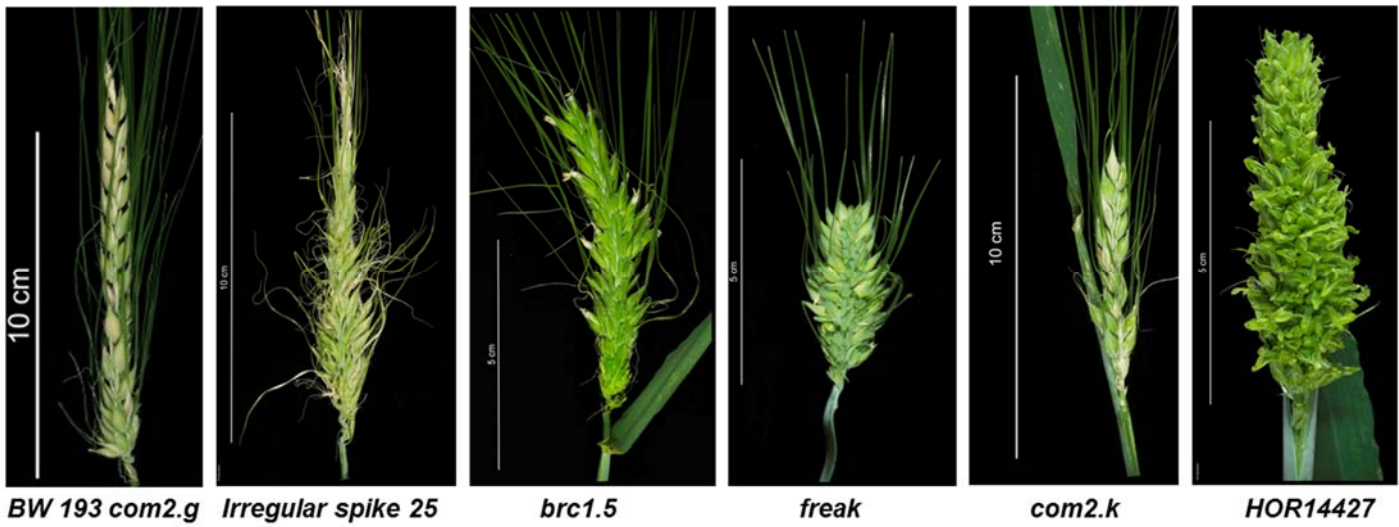

**Figure S1 Additional mutant alleles of spike branching in barley.** Different *com2* mutant alleles identified by resequencing of the *COM2* ORF region. The *irregular spike25* mutant shows a higher degree of spikelet infertility. *HOR14427* is a double mutant of *com2*/hooded, see Table S1.

### A. Barley; low resolution genetic map

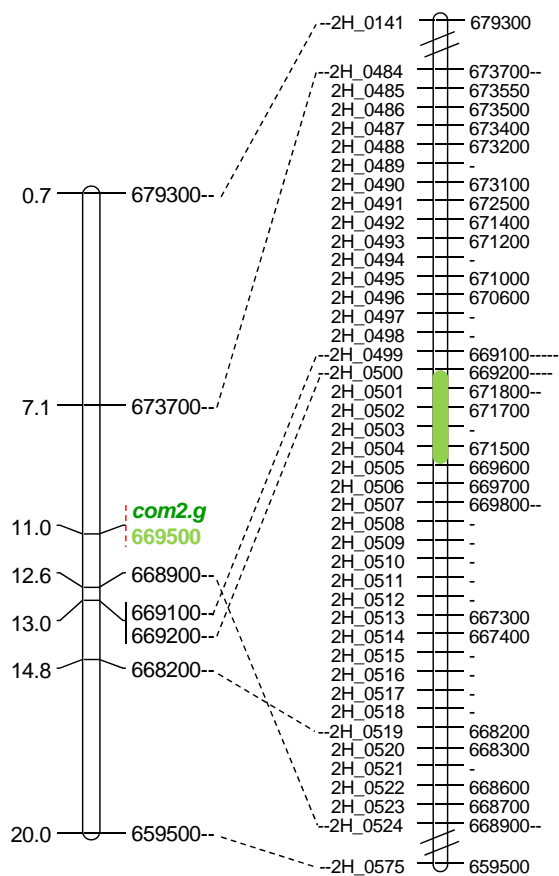

### B. Wheat; low resolution genetic map

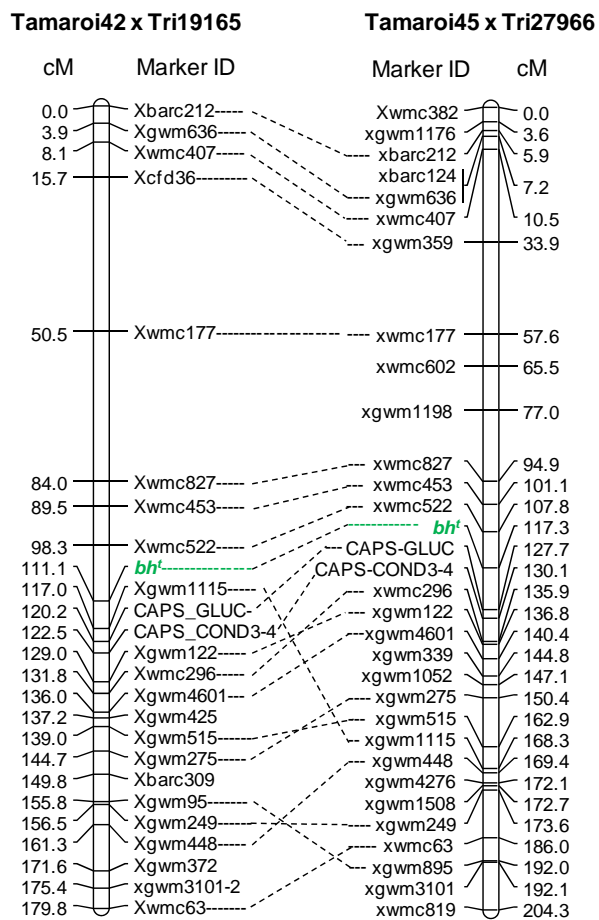

**Figure S2 Low resolution linkage map of *com2.g* and *bh<sup>t</sup>* locus in barley and tetraploid wheat. (A)** Genetic linkage mapping of *com2.g* in barley. The genome zipper (GZ) model of barley chromosome 2H was considered as resource for marker development. Predicted order of rice genes along this barley chromosome is shown, all gene identifiers start originally with Os07g0. The virtual position for candidate gene ortholog (*Os07g0669500*) was not initially provided; a position (green area) was assumed for the *Os07g0669500* gene according to the gene identifier. Barley BW 192 (*com2.g*) and barley cv. Haruna Nijo were used as mutant and the wild type parents of the population, respectively. **(B)** Genetic linkage mapping of the *branched head<sup>t</sup>* (*bh<sup>t</sup>*) locus in two different tetraploid wheat F<sub>2</sub> mapping populations. Connected markers represent those used in both populations. cM stands for centiMorgan. Tetraploid wheat Tamaroi45 and Tamaroi42 were used as wild type while TRI 19165 and TRI 27966 were mutant parents of the corresponding population.

Bowman MSIRSSGGSGGGQTSQMMAFSEHSLPKPIAGHPQPQSPSSPSERPAPRGRRAQEPG 60  
Irregular spike 25 MSIRSSGGSGGGQTSQMMAFSEHSLPKPIAGHPQPQSPSSPSERPAPRGRRAQEPG 60  
Foma MSIRSSGGSGGGQTSQMMAFSEHSLPKPIAGHPQPQSPSSPSERPAPRGRRAQEPG 60  
Donaria MSIRSSGGSGGGQTSQMMAFSEHSLPKPIAGHPQPQSPSSPSERPAPRGRRAQEPG 60  
Morex MSIRSSGGSGGGQTSQMMAFSEHSLPKPIAGHPQPQSPSSPSERPAPRGRRAQEPG 60  
Optic MSIRSSGGSGGGQTSQMMAFSEHSLPKPIAGHPQPQSPSSPSERPAPRGRRAQEPG 60  
Haruna Nijo MSIRSSGGSGGGQTSQMMAFSEHSLPKPIAGHPQPQSPSSPSERPAPRGRRAQEPG 60  
brcl.5 MSIRSSGGSGGGQTSQMMAFSEHSLPKPIAGHPQPQSPSSPSERPAPRGRRAQEPG 60  
com2.k MSIRSSGGSGGGQTSQMMAFSEHSLPKPIAGHPQPQSPSSPSERPAPRGRRAQEPG 60  
Freak MSIRSSGGSGGGQTSQMMAFSEHSLPKPIAGHPQPQSPSSPSERPAPRGRRAQEPG 60  
HOR14427 MSIRSSGGSGGGQTSQMMAFSEHSLPKPIAGHPQPQSPSSPSERPAPRGRRAQEPG 60  
BM-NIL (BW192)com2.g MSIRSSGGSGGGQTSQMMAFSEHSLPKPIAGHPQPQSPSSPSERPAPRGRRAQEPG 60  
\*\*\*\*\*

Bowman RFLGVRRRPWGRYAAEIRDPTTKERHWLGTFTDQEAALAYDRAALS MKGAQARTNFVYA 120  
Irregular spike 25 RFLGVRRRPWGRYAAEIRDPTTKERHWLGTFTDQEAALAYDRAALS MKGAQARTNFVYA 120  
Foma RFLGVRRRPWGRYAAEIRDPTTKERHWLGTFTDQEAALAYDRAALS MKGAQARTNFVYA 120  
Donaria RFLGVRRRPWGRYAAEIRDPTTKERHWLGTFTDQEAALAYDRAALS MKGAQARTNFVYA 120  
Morex RFLGVRRRPWGRYAAEIRDPTTKERHWLGTFTDQEAALAYDRAALS MKGAQARTNFVYA 120  
Optic RFLGVRRRPWGRYAAEIRDPTTKERHWLGTFTDQEAALAYDRAALS MKGAQARTNFVYA 120  
Haruna Nijo RFLGVRRRPWGRYAAEIRDPTTKERHWLGTFTDQEAALAYDRAALS MKGAQARTNFVYA 120  
brcl.5 RFLGVRRRPWGRYAAEIRDPTTKERHWLGTFTDQEAALAYDRAALS MKGAQARTNFVYA 120  
com2.k RFLGVRRRPWGRYAAEIRDPTTKERHWLGTFTDQEAALAYDRAALS MKGAQARTNFVYA 120  
Freak RFLGVRRRPWGRYAAEIRDPTTKERHWLGTFTDQEAALAYDRAALS MKGAQARTNFVYA 120  
HOR14427 RFLGVRRRPWGRYAAEIRDPTTKERHWLGTFTDQEAALAYDRAALS MKGAQARTNFVYA 120  
BM-NIL BW192com2.g RFLGVRRRPWGRYAAEIRDPTTKERHWLGTFTDQEAALAYDRAALS MKGAQARTNFVYA 120  
\*\*\*\*\*

Bowman HAA YNNYPPFLAPFHAQPAYASSTMPYGGQHQHAGAAPPHIGSYHSHGCVGYHQGGPGAGA 180  
Irregular spike 25 HAA YNNYPPFLAPFHAQPAYASSTMPYGGQHQHAGAAPPHIGSYHSHGCVGYHQGGPGAGA 180  
Foma HAA YNNYPPFLAPFHAQPAYASSTMPYGGQHQHAGAAPPHIGSYHSHGCVGYHQGGPGAGA 180  
Donaria HAA YNNYPPFLAPFHAQPAYASSTMPYGGQHQHAGAAPPHIGSYHSHGCVGYHQGGPGAGA 180  
Morex HAA YNNYPPFLAPFHAQPAYASSTMPYGGQHQHAGAAPPHIGSYHSHGCVGYHQGGPGAGA 180  
Optic HAA YNNYPPFLAPFHAQPAYASSTMPYGGQHQHAGAAPPHIGSYHSHGCVGYHQGGPGAGA 180  
Haruna Nijo HAA YNNYPPFLAPFHAQPAYASSTMPYGGQHQHAGAAPPHIGSYHSHGCVGYHQGGPGAGA 180  
brcl.5 HAA YNNYPPFLAPFHAQPAYASSTMPYGGQHQHAGAAPPHIGSYHSHGCVGYHQGGPGAGA 180  
com2.k HAA YNNYPPFLAPFHAQPAYASSTMPYGGQHQHAGAAPPHIGSYHSHGCVGYHQGGPGAGA 180  
Freak HAA YNNYPPFLAPFHAQPAYASSTMPYGGQHQHAGAAPPHIGSYHSHGCVGYHQGGPGAGA 180  
HOR14427 HAA YNNYPPFLAPFHAQPAYASSTMPYGGQHQHAGAAPPHIGSYHSHGCVGYHQGGPGAGA 180  
BM-NIL BW192com2.g HAA YNNYPPFLAPFHAQPAYASSTMPYGGQHQHAGAAPPHIGSYHSHGCVGYHQGGPGAGA 180  
\*\*\*\*\*

(L228H)

Bowman GECSMPV PNAADHAAS PMDVRS SSGHDFLFP SADDNSGYLS SVVPE SCLRPRGGDLQDARR 240  
Irregular spike 25 GECSMPV PNAADHAAS PMDVRS SSGHDFLFP SADDNSGYLS SVVPE SC~~R~~PRGGDLQDARR 240  
Foma GECSMPV PNAADHAAS PMDVRS SSGHDFLFP SADDNSGYLS SVVPE SCLRPRGGDLQDARR 240  
Donaria GECSMPV PNAADHAAS PMDVRS SSGHDFLFP SADDNSGYLS SVVPE SCLRPRGGDLQDARR 240  
Morex GECSMPV PNAADHAAS PMDVRS SSGHDFLFP SADDNSGYLS SVVPE SCLRPRGGDLQDARR 240  
Optic GECSMPV PNAADHAAS PMDVRS SSGHDFLFP SADDNSGYLS SVVPE SCLRPRGGDLQDARR 240  
Haruna Nijo GECSMPV PNAADHAAS PMDVRS SSGHDFLFP SADDNSGYLS SVVPE SCLRPRGGDLQDARR 240  
brcl.5 GECSMPV PNAADHAAS PMDVRS SSGHDFLFP SADDNSGYLS ~~R~~VVPE SCLRPRGGDLQDARR 240  
com2.k GECSMPV PNAADHAAS PMDVRS SSGHDFLFP SADDNSGYLS ~~R~~VVPE SCLRPRGGDLQDARR 240  
Freak GECSMPV PNAADHAAS PMDVRS SSGHDFLFP SADDNSGYLS ~~R~~VVPE SCLRPRGGDLQDARR 240  
HOR14427 GECSMPV PNAADHAAS PMDVRS SSGHDFLFP SADDNSGYLS ~~R~~VVPE SCLRPRGGDLQDARR 240  
BM-NIL BW192 com2.g GECSMPV PNAADHAAS PMDVRS SSGHDFLFP SADDNSGYLS ~~R~~VVPE SCLRPRGGDLQDARR 240  
\*\*\*\*\*

(S221R)

Bowman YSVSDADAYGLGLREDVDDLAS MVAGFWGGADAA YGGFAPANGGGHDMVAS SQGSDNGYS 300  
Irregular spike 25 YSVSDADAYGLGLREDVDDLAS MVAGFWGGADAA YGGFAPANGGGHDMVAS SQGSDNGYS 300  
Foma YSVSDADAYGLGLREDVDDLAS MVAGFWGGADAA YGGFAPANGGGHDMVAS SQGSDNGYS 300  
Donaria YSVSDADAYGLGLREDVDDLAS MVAGFWGGADAA YGGFAPANGGGHDMVAS SQGSDNGYS 300  
Morex YSVSDADAYGLGLREDVDDLAS MVAGFWGGADAA YGGFAPANGGGHDMVAS SQGSDNGYS 300  
Optic YSVSDADAYGLGLREDVDDLAS MVAGFWGGADAA YGGFAPANGGGHDMVAS SQGSDNGYS 300  
Haruna Nijo YSVSDADAYGLGLREDVDDLAS MVAGFWGGADAA YGGFAPANGGGHDMVAS SQGSDNGYS 300  
brcl.5 YSVSDADAYGLGLREDVDDLAS MVAGFWGGADAA YGGFAPANGGGHDMVAS SQGSDNGYS 287  
com2.k YSVSDADAYGLGLREDVDDLAS MVAGFWGGADAA YGGFAPANGGGHDMVAS SQGSDNGYS 300  
Freak YSVSDADAYGLGLREDVDDLAS MVAGFWGGADAA YGGFAPANGGGHDMVAS SQGSDNGYS 300  
HOR14427 YSVSDADAYGLGLREDVDDLAS MVAGFWGGADAA YGGFAPANGGGHDMVAS SQGSDNGYS 300  
BM-NIL BW192com2.g YSVSDADAYGLGLREDVDDLAS MVAGFWGGADAA YGGFAPANGGGHDMVAS SQGSDNGYS 300  
\*\*\*\*\*

Bowman PFSFLSH 307  
Irregular spike 25 PFSFLSH 307  
Foma PFSFLSH 307  
Donaria PFSFLSH 307  
Morex PFSFLSH 307  
Optic PFSFLSH 307  
Haruna Nijo PFSFLSH 307  
brcl.5 PFSFLSH 307  
com2.k PFSFLSH 307  
Freak PFSFLSH 307  
HOR14427 PFSFLSH 307  
BM-NIL BW192com2.g PFSFLSH 307

**Figure S3 COM2 protein sequence alignment of different mutant alleles:** Mutated positions between parents of the population BW-NIL(*com2.g*) and Haruna Nijo as well as other identified mutants that either shared the same mutation observed in the mutant parent of *com2.g* (S221R) (four mutants; *brc1.5*, *com.k*, Freak , HOR14427) or showed a different mutation (L228H) (one mutant; the *irregular spike 25*). The remaining cultivars represent the donor lines; see Table S1.

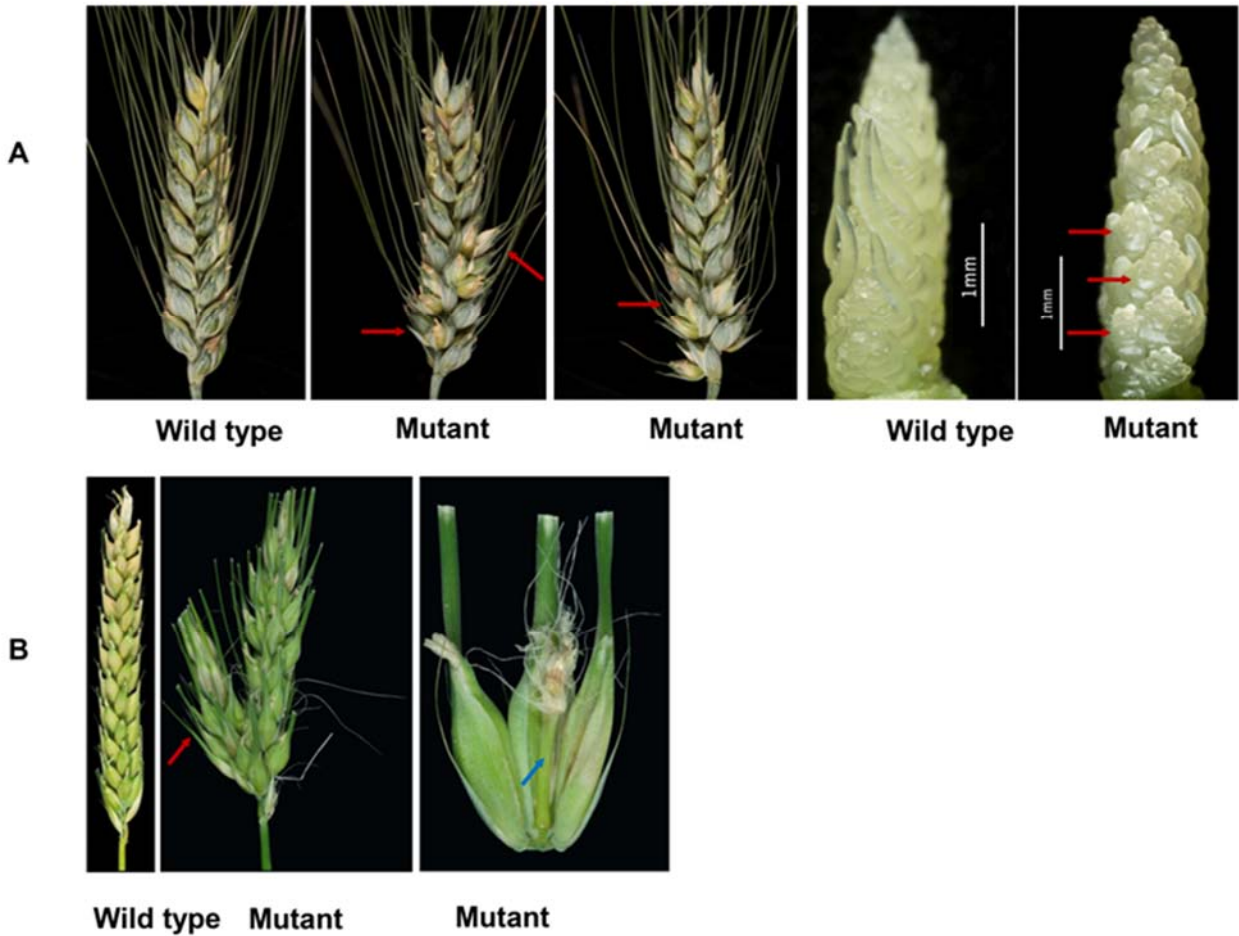

**Figure S4 Phenotype of the tetraploid wheat and barley TILLING lines. (A)** Supernumerary spikelet formation at the wheat homozygous TILLING plant T4-2447-7 (Mutant). The donor cultivar is tetraploid wheat cv. Kronos (Wild type). The images at the far right showed ectopic branch formation (red arrows) at early stage of development of cv. Kronos (Wild type) and the T4-2447-7 (Mutant). **(B)** Branch formation of the two barley TILLING mutant plants derived from barley cv. Morex (Wild type). Branch formation showed a range of severity from formation of a small-sized secondary spike (red arrows) to an extended rachilla at the central spikelet (blue arrows).

**A**

-2,75      1:1      2,75

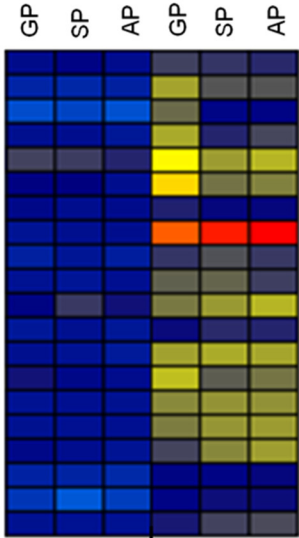

**Harvest-ID**

**ATH SEQ DESC**

**FUNCAT**

|                  |                                                                  |                                                                      |
|------------------|------------------------------------------------------------------|----------------------------------------------------------------------|
| 35_4012          | IAA8 (indoleacetic acid-induced protein 8); transcription factor | hormone metabolism, auxin, induced-regulated-responsive-activated    |
| Contig10299_at   | gibberellin 2-oxidase / GA2-oxidase (GA2OX2)                     | hormone metabolism, gibberellin, synthesis-degradation, GA2 oxidase  |
| Contig602_at     | sucrose synthase, putative / sucrose-UDP glucosyltransferase,    | major CHO metabolism, degradation, sucrose, Susy                     |
| Contig481_at     | sucrose synthase / sucrose-UDP glucosyltransferase (SUS1)        | major CHO metabolism, degradation, sucrose, Susy                     |
| 35_14480         | sucrose synthase/transferase, transferring glycosyl groups       | major CHO metabolism, degradation, sucrose, Susy                     |
| Contig481_s_at   | sucrose synthase, putative / sucrose-UDP glucosyltransferase,    | major CHO metabolism, degradation, sucrose, Susy                     |
| HU05105u_x_at    | sucrose synthase type I                                          | major CHO metabolism, degradation, sucrose, Susy                     |
| 35_13498         | no description                                                   | not assigned, unknown                                                |
| 35_49587         | AGP9 (ARABINO GALACTAN PROTEIN 9)                                | not assigned, unknown                                                |
| 35_29657         | F-box family protein (FBL10)                                     | not assigned, unknown                                                |
| 35_35664         | no description                                                   | not assigned, unknown                                                |
| 35_50591         | zinc finger (MYND type) family protein / F-box family protein    | not assigned, unknown                                                |
| 35_16272         | BTB-POZ AND MATH DOMAIN 1; protein binding                       | protein, degradation, ubiquitin, E3, BTB/POZ Cullin3, BTB/POZ        |
| 35_4488          | BRASSINOSTEROID-RESPONSIVE RING-H2; protein binding              | protein, degradation, ubiquitin, E3, RING                            |
| Contig12668_s_at | E2F transcription factor-3 (E2F3)                                | RNA, regulation of transcription, E2F/DP transcription factor family |
| Contig12668_at   | E2F transcription factor-3 (E2F3)                                | RNA, regulation of transcription, E2F/DP transcription factor family |
| 35_20248         | E2F3 (E2F TRANSCRIPTION FACTOR-3)                                | RNA, regulation of transcription, E2F/DP transcription factor family |
| Contig15953_at   | F-box family protein / tubby family protein                      | RNA, regulation of transcription, TUB transcription factor family    |
| 35_15379         | DNA-directed RNA polymerase II, putative                         | RNA, transcription                                                   |
| 35_16422         | DNA-directed RNA polymerase I, II, and III, putative             | RNA, transcription                                                   |

Bowman | BW-NIL com2.g

**B**

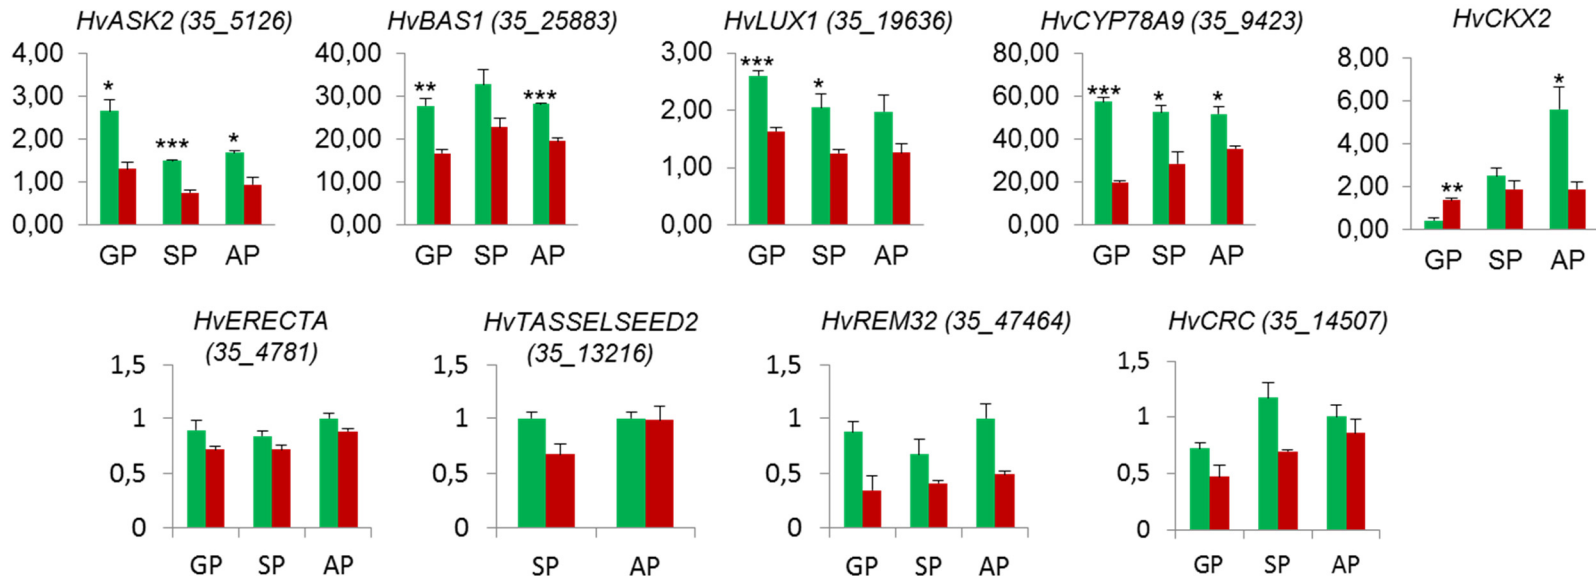

**Figure S5 Transcriptome analysis of *com2.g* using microarray experiments and independent qRT PCR validations.** (A) Heat map of genes conjointly up-regulated in the BW-NIL(*com2.g*) as compared to the corresponding wild type cv. Bowman. For down-regulated genes in the mutant; see Figure S5A. The scale bar at the top of the heat map indicates the transcript level of differentially regulated genes observed between wild type and mutant (blue color indicates down-regulation while red shows up-regulation). (B) qRT-PCR analysis performed for validation of down-regulated genes identified in the BW-NIL*com2.g* (red) as compared to the corresponding wild type cv. Bowman (green). Only highly relevant genes (9 genes) were picked up for qRT-PCR validation. Of these genes, five randomly selected genes were validated using three different biological replicates (B; upper panel) while the remaining four genes were validated using one biological, (with four technical replicates). The mean  $\pm$  SE of three biological or technical replicates is shown. Expression values were log<sub>10</sub> transformed. Asterisks show the significance level calculated by Student's t-test, (no asterisk corresponds to  $p > 0.05$ . While, single, double and triple asterisks stand for  $p \leq 0.05$ ,  $p \leq 0.01$  and  $p \leq 0.001$ , respectively). The Y-axis value shows the expression relative to *HvActin*. For the description of the genes; see Figure 4A and File S1. Corresponding unigene IDs or barley MLOC IDs are given in parentheses. Mean  $\pm$  S.E of one biological replicate is shown. Y axis is the relative expression of the corresponding gene to *HvActin*. The developmental stages analyzed during microarray and qRT PCR experiments include TM: triple mound, GP: glume primordium, SP: stamen primordium and AP: awn primordium.



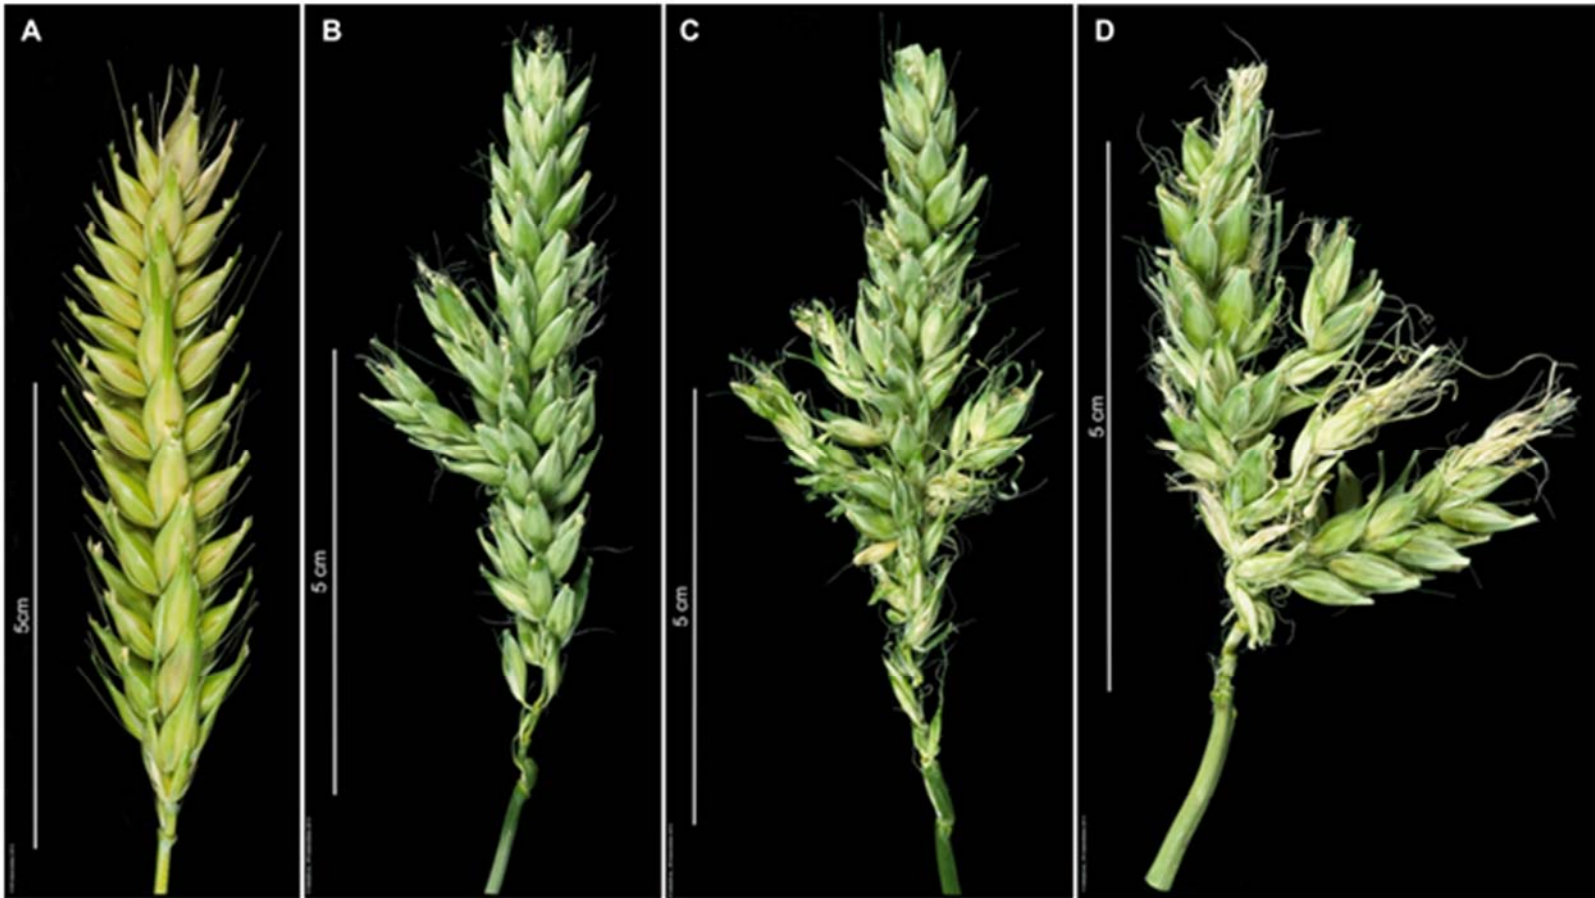

**Figure S6 Branch formation in *vrs4* mutant (*mul1.a*).** (A) Mature spike of wild type progenitor cv. Montcalm with determinate triple spikelet meristem. (B-D) Mature spikes of *vrs4* mutant MC (*mul1.a*) showing various levels of branch proliferation at the spike base and middle portion of the spike.

SI TABLES

Table S1 Complementary information of the BW-NIL(*com2.g*) allelic mutants.

| Branched ( <i>compositum</i> ) Barleys | origin                                                                                                                                   |
|----------------------------------------|------------------------------------------------------------------------------------------------------------------------------------------|
| BW-NIL BW 192 ( <i>com2.g</i> )        | EMS or neutrons; branched spike; pedigree: BOWMAN *8/4/ 7.1 / 3ND8670 // ND7015 / CIM; <i>com2.g</i> allele                              |
| HOR 14427                              | according to M. Stanca: double mutant mk: m=branched/k=hooded; <i>m</i> and <i>k</i> old symbols, have to be <i>mul</i> and <i>Kap</i> : |
| FREAK                                  | dense branched ?? ; cv. Freak; 1961; <b>FREAK is not a cultivar but a selection of CIMMYT collection.</b>                                |
| <i>com.k</i>                           | spontaneous mutant probably in Atlas (PI 539108) isolated by C.A. Suneson                                                                |
| <i>Irregular spike 25</i>              | EMS; induced mutant in Foma (CIho 11333, <b>NGB 14659</b> ) isolated by U. Lundqvist                                                     |
| <i>brc1.5</i>                          | A naturally occurring variant in barley from the Braunschweig seed collection                                                            |

**Table S2 Different barley TILLING plants and the corresponding positions of different amino acid substitution.**

| Mutant ID                                | population | SNP position | SNP | SNP allele   | aa substitution | Domain position       | Conservation     |
|------------------------------------------|------------|--------------|-----|--------------|-----------------|-----------------------|------------------|
| 10782-1                                  | Barke      | 151          | C→T | Heterozygote | R → C           | -                     | -                |
| 10607-1                                  | Barke      | 155          | G→A | Heterozygote | G → D           | -                     | -                |
| 12171-1                                  | Barke      | 176          | C→T | Heterozygote | P → L           | -                     | conserved region |
| 2723-1                                   | Barke      | 308          | G→A | Homozygote   | R → H           | within AP2/ERF domain | conserved region |
| 3919-1                                   | Barke      | 320          | C→T | Heterozygote | S → F           | within AP2/ERF domain | conserved region |
| 6816-1                                   | Barke      | 529          | G→A | Homozygote   | G → S           | -                     | -                |
| 11023-1                                  | Barke      | 541          | G→A | Homozygote   | G → S           | -                     | -                |
| 11359-1                                  | Barke      | 572          | C→T | Homozygote   | A → V           | -                     | -                |
| 4913-1                                   | Barke      | 587          | G→A | Homozygote   | S → N           | -                     | -                |
| 13679-2                                  | Barke      | 605          | G→A | Homozygote   | S → N           | -                     | -                |
| 6872-1                                   | Barke      | 631          | A→T | Homozygote   | S → C           | -                     | -                |
| 9662-1                                   | Barke      | 662          | G→A | Homozygote   | S → N           | -                     | conserved region |
| 6893-1                                   | Barke      | 695          | G→A | Homozygote   | G → D           | -                     | -                |
| 9624-1                                   | Barke      | 748          | G→T | Heterozygote | G → W           | -                     | -                |
| 48                                       | Morex      | 329          | G→A | Heterozygote | G → D (110)     | within AP2/ERF domain | conserved region |
| 5865                                     | Morex      | 286          | G→A | Homozygote   | E → K (96)      | within AP2/ERF domain | conserved region |
| AP2/ERF domain                           |            |              |     | 184 - 357 bp |                 |                       |                  |
| phylogenetically highly conserved domain |            |              |     | 638 - 691 bp |                 |                       |                  |

Table S3 Barley accessions used for *COM2* haplotype detection and the respective haplotype identified

| Accession ID                          | 216bp | 300bp | 414bp | 494bp | 536bp | 642bp | 663bp | 696bp | 822bp | 873bp   | Haplotype category |
|---------------------------------------|-------|-------|-------|-------|-------|-------|-------|-------|-------|---------|--------------------|
| MUT2201 com2.f                        | G     | C     | C     | C     | G     | C     | C     | C     | A     | MISSING | ?                  |
| GM 1E Nudinka                         | G     | C     | C     | C     | G     | C     | C     | C     | A     | A       | I                  |
| GM713 Morex                           | G     | C     | C     | C     | G     | C     | C     | C     | A     | A       | I                  |
| GM712 Donaria                         | G     | C     | C     | C     | G     | C     | C     | C     | A     | A       | I                  |
| Haruna Nijo                           | G     | C     | C     | C     | G     | C     | C     | C     | A     | A       | I                  |
| Barke                                 | G     | C     | C     | C     | G     | C     | C     | C     | A     | A       | I                  |
| 3167                                  | G     | C     | C     | C     | G     | C     | C     | C     | A     | A       | I                  |
| 3906                                  | G     | C     | C     | C     | G     | C     | C     | C     | A     | A       | I                  |
| GM 504 vulg. hybernum vikayarvi       | G     | C     | C     | C     | G     | C     | C     | C     | A     | A       | I                  |
| GM 505 vulg. hybernum tystofte korsby | G     | C     | C     | C     | G     | C     | C     | C     | A     | A       | I                  |
| GM 506 vulg. parallelum montafon      | G     | C     | C     | C     | G     | C     | C     | C     | A     | A       | I                  |
| GM 507 vulg. parallelum sechszeilige  | G     | C     | C     | C     | G     | C     | C     | C     | A     | A       | I                  |
| GM 508 vulg. hybernum arrecife        | G     | C     | C     | C     | G     | C     | C     | C     | A     | A       | I                  |
| GM 511 vulg. hybernum poliarnyj 14    | G     | C     | C     | C     | G     | C     | C     | C     | A     | A       | I                  |
| GM 513 vulg. hybernum oberbrucker     | G     | C     | C     | C     | G     | C     | C     | C     | A     | A       | I                  |
| GM 516 vulg. subviolaceum abessinien  | G     | C     | C     | C     | G     | C     | C     | C     | A     | A       | I                  |
| GM 527 dist. nutans sarah             | G     | C     | C     | C     | G     | C     | C     | C     | A     | A       | I                  |
| GM 528 dist. nutans loosdorfer        | G     | C     | C     | C     | G     | C     | C     | C     | A     | A       | I                  |
| GM 529 dist. nutans proskowetz gerste | G     | C     | C     | C     | G     | C     | C     | C     | A     | A       | I                  |
| GM 530 dist. nutans triumf            | G     | C     | C     | C     | G     | C     | C     | C     | A     | A       | I                  |
| GM 531 dist. nutans carbonera         | G     | C     | C     | C     | G     | C     | C     | C     | A     | A       | I                  |
| GM 532 dist. nutans martonvasari      | G     | C     | C     | C     | G     | C     | C     | C     | A     | A       | I                  |
| GM 533 dist. nutans saratov           | G     | C     | C     | C     | G     | C     | C     | C     | A     | A       | I                  |
| GM 537 dist. erectum hokudai no. 1    | G     | C     | C     | C     | G     | C     | C     | C     | A     | A       | I                  |
| GM 542 vulg. hybernum lyallpur        | G     | C     | C     | C     | G     | C     | C     | C     | A     | A       | I                  |
| GM 543 vulg. wisconsin H42 (linie)    | G     | C     | C     | C     | G     | C     | C     | C     | A     | A       | I                  |
| GM 550 fap1 2158 L                    | G     | C     | C     | C     | G     | C     | C     | C     | A     | A       | I                  |
| GM 558 dist. glabriectum sanalta      | G     | C     | C     | C     | G     | C     | C     | C     | A     | A       | I                  |
| GM 561 dist. nutans pfaelzer land     | G     | C     | C     | C     | G     | C     | C     | C     | A     | A       | I                  |
| GM 562 dist. nutans szekacs linie II  | G     | C     | C     | C     | G     | C     | C     | C     | A     | A       | I                  |
| GM 563 dist. nutans maiamana          | G     | C     | C     | C     | G     | C     | C     | C     | A     | A       | I                  |
| GM1050C brc1.5                        | G     | C     | C     | C     | G     | C     | A     | C     | A     | G       | II                 |
| GM1116 com2.g                         | G     | C     | C     | C     | G     | C     | A     | C     | A     | G       | II                 |
| GM1118 com2.g introg bow              | G     | C     | C     | C     | G     | C     | A     | C     | A     | G       | II                 |
| GM570 Optic                           | G     | C     | C     | C     | G     | C     | C     | C     | A     | G       | III                |
| GM 500 Wild agriocrithon              | G     | C     | C     | C     | G     | C     | C     | C     | A     | G       | III                |
| GM 518 vulg. trifurcatum aegypten     | G     | C     | C     | C     | G     | C     | C     | C     | A     | G       | III                |

|                                          |   |   |   |   |   |   |   |   |   |         |     |
|------------------------------------------|---|---|---|---|---|---|---|---|---|---------|-----|
| GM 545 fap1 ooo8a                        | G | C | C | C | G | C | C | C | A | G       | III |
| GM 548 fap1 2158 B                       | G | C | C | C | G | C | C | C | A | G       | III |
| GM 564 hexastichon hybernum abarik       | G | C | C | C | G | C | C | C | A | G       | III |
| GM1087 Bowman                            | G | A | G | G | G | C | C | T | A | G       | IV  |
| GM702 Bowman                             | G | A | G | G | G | C | C | T | A | G       | IV  |
| GM21 Proctor                             | G | A | G | G | G | C | C | T | A | G       | IV  |
| GM 569 Golden Promise                    | G | A | G | G | G | C | C | T | A | G       | IV  |
| BM-NIL-flo-a.5 (BW369)                   | G | A | G | G | G | C | C | T | A | G       | IV  |
| Igri                                     | G | A | G | G | G | C | C | T | A | MISSING | IV  |
| GM 502 sp11 085-50                       | G | A | G | G | G | C | C | T | A | G       | IV  |
| GM 503 vulg. coeleste kleine nachtgerste | G | A | G | G | G | C | C | T | A | G       | IV  |
| GM 514 vulg. hybernum estanzuela         | G | A | G | G | G | C | C | T | A | G       | IV  |
| GM 515 vulg. hybernum elses              | G | A | G | G | G | C | C | T | A | G       | IV  |
| GM 517 vulg. hybernum marokkanische      | G | A | G | G | G | C | C | T | A | G       | IV  |
| GM 519 vulg. hybernum algerian           | G | A | G | G | G | C | C | T | A | G       | IV  |
| GM 522 vulg. himalayense tibet           | G | A | G | G | G | C | C | T | A | G       | IV  |
| GM 523 vulg. horsfordianum weihenstephan | G | A | G | G | G | C | C | T | A | G       | IV  |
| GM 524 dist. nudiforcatum erfurt         | G | A | G | G | G | C | C | T | A | G       | IV  |
| GM 525 dist. nutans kenia                | G | A | G | G | G | C | C | T | A | G       | IV  |
| GM 526 dist. nutans spratt archer        | G | A | G | G | G | C | C | T | A | G       | IV  |
| GM 534 dist. nutans swannek              | G | A | G | G | G | C | C | T | A | G       | IV  |
| GM 535 dist. medicum anatolien           | G | A | G | G | G | C | C | T | A | G       | IV  |
| GM 536 dist. nigricans mandschurei       | G | A | G | G | G | C | C | T | A | G       | IV  |
| GM 538 dist. nutans australische fruche  | G | A | G | G | G | C | C | T | A | G       | IV  |
| GM 541 vulg. hybernum aegyptische        | G | A | G | G | G | C | C | T | A | G       | IV  |
| GM 546 dist. nutans bannerts             | G | A | G | G | G | C | C | T | A | G       | IV  |
| GM 547 fap 1 0266C                       | G | A | G | G | G | C | C | T | A | G       | IV  |
| GM 554 ucnw c177                         | G | A | G | G | G | C | C | T | A | G       | IV  |
| GM 555 npc 0006                          | G | A | G | G | G | C | C | T | A | G       | IV  |
| GM 556 siglah                            | G | A | G | G | G | C | C | T | A | G       | IV  |
| GM 557 siglah                            | G | A | G | G | G | C | C | T | A | G       | IV  |
| GM 560 dist. nutans agio                 | G | A | G | G | G | C | C | T | A | G       | IV  |
| GM 565 hexastichon hybernum chilean      | G | A | G | G | G | C | C | T | A | G       | IV  |
| GM 566 MPI 2                             | G | A | G | G | G | C | C | T | A | G       | IV  |
| GM 501 ucnw016                           | T | C | G | G | A | A | C | T | G | G       | V   |
| GM 509 vulg. nigroibericum otello        | T | C | G | G | A | A | C | T | G | G       | V   |
| GM 549 fap 1 2158 H                      | T | C | G | G | A | A | C | T | G | G       | V   |
| GM 540 deficiens steudelii abessinien    | T | C | G | G | A | A | C | T | G | G       | V   |
| GM 551 deficiens erythraeum foa II       | T | C | G | G | A | A | C | T | G | G       | V   |
| GM 559 deficiens deficiens fehlgerste    | T | C | G | G | A | A | C | T | G | G       | V   |

|                                                |              |   |   |   |   |   |   |   |   |   |     |
|------------------------------------------------|--------------|---|---|---|---|---|---|---|---|---|-----|
| <b>GM 539 intermedium gymnanomalum</b>         | T            | C | G | G | A | C | C | T | G | G | VI  |
| <b>GM 510 vulg. hybernum isthmos</b>           | G            | C | G | G | G | C | C | C | A | G | VII |
| <b>GM 512 vulg. rikotense brant</b>            | G            | C | G | G | G | C | C | C | A | G | VII |
| <b>GM 520 vulg. hybernum parallelum samsun</b> | G            | C | G | G | G | C | C | C | A | G | VII |
| <b>GM 521 vulg. parallelum libanon</b>         | G            | C | G | G | G | C | C | C | A | G | VII |
| <b>GM 544 ucnwc72a</b>                         | G            | C | G | G | G | C | C | C | A | G | VII |
| <b>GM 552 vulg. dundar-beyi nippon</b>         | G            | C | G | G | G | C | C | C | A | G | VII |
| <b>GM 553 intermedium horlani arlington</b>    | G            | C | G | G | G | C | C | C | A | G | VII |
| AP2/ERF domain                                 | 184 - 357 bp |   |   |   |   |   |   |   |   |   |     |
| phylogenetically highly conserved domain       | 638 - 691 bp |   |   |   |   |   |   |   |   |   |     |

**Table S4 Tetraploid ‘Miracle Wheat’ used for allelism test and the corresponding F<sub>1</sub> phenotype.**

| Cross    |   |          | Resulted Progeny | plant number | spikes per plant | branched spikes    |
|----------|---|----------|------------------|--------------|------------------|--------------------|
| Tri 3261 | * | Tri 9652 | plant 1          | XIX-2012-1   | 3                | 1                  |
| Tri 3261 | * | Tri 9652 | plant 2          | XIX-2012-2   | 3                | no branched spikes |
| Tri 3261 | * | Tri 9652 | plant 3          | XIX-2012-3   | 2                | 2                  |
| Tri 3261 | * | Tri 9652 | plant 4          | XIX-2012-4   | 4                | 3                  |
| Tri 3261 | * | Tri 9652 | plant 5          | XIX-2012-5   | 2                | 2                  |
| Tri 3261 | * | Tri 9652 | plant 6          | XIX-2012-6   | 2                | 2                  |
| Tri 3261 | * | Tri 9652 | plant 7          | XIX-2012-7   | 4                | 4                  |
| Tri 3261 | * | Tri 9652 | plant 8          | XIX-2012-8   | 3                | 3                  |
| Tri 3261 | * | Tri 9652 | plant 9          | XIX-2012-9   | 3                | 3                  |
| Tri 3261 | * | Tri 9652 | plant 10         | XIX-2012-10  | 3                | 3                  |
| Tri 9652 | * | Tri 3261 | plant 1          | XIX-2012-11  | 4                | 4                  |
| Tri 9652 | * | Tri 3261 | plant 2          | XIX-2012-12  | 2                | 2                  |
| Tri 9652 | * | Tri 3261 | plant 3          | XIX-2012-13  | 3                | 3                  |
| Tri 9652 | * | Tri 3261 | plant 4          | XIX-2012-14  | 3                | 2                  |
| Tri 9652 | * | Tri 3261 | plant 5          | XIX-2012-15  | 3                | 3                  |
| Tri 9652 | * | Tri 3261 | plant 6          | XIX-2012-16  | 3                | 3                  |
| Tri 9652 | * | Tri 3261 | plant 7          | XIX-2012-17  | 4                | 4                  |
| Tri 9652 | * | Tri 3261 | plant 8          | XIX-2012-18  | 2                | 2                  |
| Tri 9652 | * | Tri 5283 | plant 1          | XIX-2012-22  | 2                | 2                  |
| Tri 9652 | * | Tri 5283 | plant 2          | XIX-2012-23  | 2                | 2                  |
| Tri 9652 | * | Tri 5283 | plant 3          | XIX-2012-24  | 3                | 3                  |
| Tri 9652 | * | Tri 5283 | plant 4          | XIX-2012-25  | 4                | 3                  |
| Tri 9652 | * | Tri 5283 | plant 5          | XIX-2012-26  | 4                | 4                  |
| Tri 9652 | * | Tri 5283 | plant 6          | XIX-2012-27  | 3                | 3                  |
| Tri 9652 | * | Tri 5283 | plant 7          | XIX-2012-28  | 3                | 3                  |
| Tri 9652 | * | Tri 5283 | plant 8          | XIX-2012-29  | 3                | 3                  |
| Tri 9652 | * | Tri 5283 | plant 2          | XIX-2012-31  | 3                | 2                  |
| Tri 9652 | * | Tri 5283 | plant 3          | XIX-2012-32  | 3                | 3                  |
| Tri 9652 | * | Tri 5283 | plant 4          | XIX-2012-33  | 3                | 3                  |
| Tri 3261 | * | Tri 5283 | plant 1          | XIX-2012-34  | 3                | 3                  |
| Tri 3261 | * | Tri 5283 | plant 2          | XIX-2012-35  | 3                | 3                  |
| Tri 3261 | * | Tri 5283 | plant 3          | XIX-2012-36  | 5                | 5                  |
| Tri 3261 | * | Tri 5283 | plant 4          | XIX-2012-37  | 3                | 3                  |
| Tri 3261 | * | Tri 5283 | plant 5          | XIX-2012-38  | 3                | 3                  |
| Tri 984  | * | Tri 5283 | plant 1          | XIX-2012-39  | 4                | 3                  |

**Table S5 Mutant and wild type Tetraploid ‘Miracle Wheat’ accessions used for resequencing of the *bh<sup>1</sup>* locus.**

| Tt-WheatID | Country of origin | Growth habit | Spike type | A genome                            |                                                              |
|------------|-------------------|--------------|------------|-------------------------------------|--------------------------------------------------------------|
|            |                   |              |            | SNP (T287C; Tamaroi45 as Reference) | corresponding aa substitution (L96P; Tamaroi45 as Reference) |
| KALKA      | AUS               | spring type  | Wild type  | Not Found                           | Not Found                                                    |
| BELLAROI   | AUS               | spring type  | Wild type  | Not Found                           | Not Found                                                    |
| TAMAROI    | AUS               | spring type  | Wild type  | Not Found                           | Not Found                                                    |
| FLORADUR   | AUT               | spring type  | Wild type  | Not Found                           | Not Found                                                    |
| WOLLAROI   | AUS               | spring type  | Wild type  | Not Found                           | Not Found                                                    |
| TRI11066   | UZB               | spring type  | Wild type  | Not Found                           | Not Found                                                    |
| TRI17236   | TUR               | spring type  | Wild type  | Not Found                           | Not Found                                                    |
| TRI2230    | USA               | spring type  | Wild type  | Not Found                           | Not Found                                                    |
| TRI3504    | POR               | spring type  | Wild type  | Not Found                           | Not Found                                                    |
| TRI758     | TUR               | spring type  | Wild type  | Not Found                           | Not Found                                                    |
| TD24       | GER               | winter type  | Wild type  | Not Found                           | Not Found                                                    |
| TD97       | GER               | winter type  | Wild type  | Not Found                           | Not Found                                                    |
| AURADUR    | AUT               | winter type  | Wild type  | Not Found                           | Not Found                                                    |
| LOGIDUR    | AUT               | winter type  | Wild type  | Not Found                           | Not Found                                                    |
| LUNADUR    | AUT               | winter type  | Wild type  | Not Found                           | Not Found                                                    |
| LUPIDUR    | AUT               | winter type  | Wild type  | Not Found                           | Not Found                                                    |
| ELSADUR    | AUT               | winter type  | Wild type  | Not Found                           | Not Found                                                    |
| TRI 13541  | ITA               | winter type  | Wild type  | Not Found                           | Not Found                                                    |
| TRI 1669   | ALB               | winter type  | Wild type  | Not Found                           | Not Found                                                    |
| TRI 19273  | TUR               | winter type  | Wild type  | Not Found                           | Not Found                                                    |
| TRI 3023   | ALB               | winter type  | Wild type  | Not Found                           | Not Found                                                    |
| TRI 3720   | ESP               | winter type  | Wild type  | Not Found                           | Not Found                                                    |
| TRI 4292   | TUR               | winter type  | Wild type  | Not Found                           | Not Found                                                    |
| TRI 4522   | CHN               | winter type  | Wild type  | Not Found                           | Not Found                                                    |
| TRI 4886   | UK                | winter type  | Wild type  | Not Found                           | Not Found                                                    |
| TRI 7021   | POL               | winter type  | Wild type  | Not Found                           | Not Found                                                    |
| TRI 7056   | FRA               | winter type  | Wild type  | Not Found                           | Not Found                                                    |
| TRI 9546   | ARM               | winter type  | Wild type  | Not Found                           | Not Found                                                    |
| TRI 9547   | ARM               | winter type  | Wild type  | Not Found                           | Not Found                                                    |
| TRI 9629   | CSFR              | winter type  | Wild type  | Not Found                           | Not Found                                                    |
| TRI 984    | EUR               | spring type  | Mutant     | Found as Homozygote                 | Found as Homozygote                                          |
| TRI 3261   | ESP               | spring type  | Mutant     | Found as Homozygote                 | Found as Homozygote                                          |
| TRI 5283   | CHN               | spring type  | Mutant     | Found as Homozygote                 | Found as Homozygote                                          |



|                     |      |              |        |                       |                       |
|---------------------|------|--------------|--------|-----------------------|-----------------------|
| TRI 18959           | FRA  | spring type? | Mutant | Found as Homozygote   | Found as Homozygote   |
| CITr 13712          | USA  | spring type  | Mutant | Found as Homozygote   | Found as Homozygote   |
| CITr 13713          | USA  | spring type  | Mutant | Found as Homozygote   | Found as Homozygote   |
| PI 225308           | IRAN | spring type  | Mutant | Found as Homozygote   | Found as Homozygote   |
| PI 349056           | ARM  | spring type  | Mutant | Found as Homozygote   | Found as Homozygote   |
| PI 438971           | KAZ  | spring type  | Mutant | Found as Homozygote   | Found as Homozygote   |
| TRI 3411            | SU   | spring type  | Mutant | Found as Homozygote   | Found as Homozygote   |
| TRI 4045            | EUR  | spring type  | Mutant | Found as Homozygote   | Found as Homozygote   |
| TRI 4341            | EUR  | spring type  | Mutant | Found as Homozygote   | Found as Homozygote   |
| TRI 5911            | IRAN | spring type  | Mutant | Found as Homozygote   | Found as Homozygote   |
| TRI 9548;W1420      | ARM  | spring type  | Mutant | Found as Homozygote   | Found as Homozygote   |
| TRI 27966           | -    | spring type  | Mutant | Found as Homozygote   | Found as Homozygote   |
| TRI 1781            | GER  | winter type  | Mutant | Found as Homozygote   | Found as Homozygote   |
| TRI 1782            | GER  | winter type  | Mutant | Found as Homozygote   | Found as Homozygote   |
| TRI 3365            | CHN  | winter type  | Mutant | Found as Homozygote   | Found as Homozygote   |
| TRI 4270            | ITA  | winter type  | Mutant | Found as Homozygote   | Found as Homozygote   |
| TRI 4446            | HUN  | winter type  | Mutant | Found as Homozygote   | Found as Homozygote   |
| TRI 4461            | EUR  | winter type  | Mutant | Found as Homozygote   | Found as Homozygote   |
| TRI 4653            | AUS  | winter type  | Mutant | Found as Homozygote   | Found as Homozygote   |
| TRI 9628;<br>;W1529 | IND  | winter type  | Mutant | Found as Homozygote   | Found as Homozygote   |
| TRI 19165           | -    | winter type  | Mutant | Found as Homozygote   | Found as Homozygote   |
| TRI 19292           | FRA  | winter type  | Mutant | Found as Homozygote   | Found as Homozygote   |
| TRI 28396           | ITA  | winter type  | Mutant | Found as Homozygote   | Found as Homozygote   |
| TRI 24012           | -    | winter type  | Mutant | Found as Heterozygote | Found as Heterozygote |
| TRI 4448            | EUR  | winter type  | Mutant | Found as Heterozygote | Found as Heterozygote |
| TRI 9652;W1554      | CSR  | spring type  | Mutant | Found as Heterozygote | Found as Heterozygote |

**Table S6 Primer information**

| PrimerID       | Orien-tation | Experiment                                                      | Sequence                    | Tm (°C) | PCR product_b p | Restriction enzyme for CAPS marker developme nt |
|----------------|--------------|-----------------------------------------------------------------|-----------------------------|---------|-----------------|-------------------------------------------------|
| HvCOM2         | Forwar d     | qRT-PCR                                                         | CGCACATTGGGTCGTACCA         | 57.9    | 107             | -                                               |
| HvCOM2         | Revers e     | qRT-PCR                                                         | GTGATCGGCGCATTGG            | 57.2    | -               | -                                               |
| HvCKX2         | Forwar d     | qRT-PCR                                                         | GTTCTGGAGCGGAAGAGGAA G      | 60      | 107             | -                                               |
| HvCKX2         | Revers e     | qRT-PCR                                                         | CGGGGCCAATCGATTAACCTTCGT G  | 60      | -               | -                                               |
| HvBAS1         | Forwar d     | qRT-PCR                                                         | AGACGCCAGATCATCACCTGTG      | 59.1    | 101             | -                                               |
| HvBAS1         | Revers e     | qRT-PCR                                                         | ACATGGTCATTTCCGGCTGTCAT     | 62.9    | -               | -                                               |
| HvIDS1         | Forwar d     | qRT-PCR                                                         | CTAGCTCTCTGCTTACTCCCATG GAC | 60      | 134             | -                                               |
| HvIDS1         | Revers e     | qRT-PCR                                                         | CATGGCTCGGCAATGTTATCTCT CTC | 59.2    | -               | -                                               |
| HvASK2         | Forwar d     | qRT-PCR                                                         | GGTTGACTCTGCGACGCGA         | 60.3    | 76              | -                                               |
| HvASK2         | Revers e     | qRT-PCR                                                         | CGTTAACGGCTGCTCCCAGG        | 60.9    | -               | -                                               |
| HvCYP78A9      | Forwar d     | qRT-PCR                                                         | CCCATTGCGCCTAAACGCGA        | 60.4    | 96              | -                                               |
| HvCYP78A9      | Revers e     | qRT-PCR                                                         | AGAAACGTACAGCAGCCAGCC       | 60.1    | -               | -                                               |
| HvCRC          | Forwar d     | qRT-PCR                                                         | ATGGATGTGCTCCTGGGTGTG       | 59.7    | 82              | -                                               |
| HvCRC          | Revers e     | qRT-PCR                                                         | TGATGTCCC GG TGGATGATCG     | 59.1    | -               | -                                               |
| HvLUX1         | Forwar d     | qRT-PCR                                                         | CAGAGTTGCAGAGAGTGTGTGC      | 58.6    | 107             | -                                               |
| HvLUX1         | Revers e     | qRT-PCR                                                         | TCTTGCCACTGCCAAAATGG        | 58.1    | -               | -                                               |
| HvRECTA        | Forwar d     | qRT-PCR                                                         | TGAAGTCGAATGGGCTGACCG       | 59.6    | 66              | -                                               |
| HvRECTA        | Revers e     | qRT-PCR                                                         | GCGTCTTAATCGACGAGCAGTCC     | 59.7    | -               | -                                               |
| HvTASSELSEE D2 | Forwar d     | qRT-PCR                                                         | ACTGCGCCTAGTTGTTTCGAG       | 57.4    | 97              | -                                               |
| HvTASSELSEE D2 | Revers e     | qRT-PCR                                                         | TCCTGCACACTCAAACCACA        | 57.1    | -               | -                                               |
| com2_p11       | Forwar d     | ForRecombinantScreen_dis tal proximal(ortholog of Os07g0673700) | CCCTTCCTCGTTAGGTACGTGTG     | 66      | 1147            | HpaII                                           |
| com2_p12       | Revers e     | ForRecombinantScreen_dis tal proximal(ortholog of Os07g0673700) | CTGGTGATTTCCCAAACCTGAAG     | 63      | -               | -                                               |
| com2_p19       | Forwar d     | ForRecombinantScreen_fla nk proximal(ortholog of                | GTCAACACACCAACGGGTCTTC      | 64      | 968             | EcoRV                                           |

|                |         |                                                                |                          |       |      |       |
|----------------|---------|----------------------------------------------------------------|--------------------------|-------|------|-------|
|                |         | Os07g0668900)                                                  |                          |       |      |       |
| com2_p20       | Reverse | ForRecombinantScreen_flank proximal(ortholog of Os07g0668900)  | AGGCCTATGGCATCATGGAAAT   | 60    | -    | -     |
| M1 (com2g_p31) | Forward | Flank marker M1 (morex_contig_1566969 CAJW011566969 carma=2HS) | CGCTACTTGGCACATTCTCA     | 60    | 1041 | Hinfl |
| M1 (com2g_p32) | Reverse | Flank marker M1 (morex_contig_1566969 CAJW011566969 carma=2HS) | CAGTTAGCTTTCGGGCTTTG     | 60    | -    | -     |
| M2 (2HS_3D)    | Forward | Flank marker M2 (ortholog of Os07g0669200)                     | GATCCACCTCCAGTAACGA      | 60    | 1061 | BsmI  |
| M2 (2HS_3D)    | Reverse | Flank marker M2 (ortholog of Os07g0669200)                     | GATGCACTGCCTCAACTCAA     | 60    | -    | -     |
| Insitu         | Forward | mRNA in-situ hybridization (cDNA isolated from cv. Bonus )     | CAACGGCTACTCACCTTCA      | 60.5  | 444  | -     |
| Insitu         | Reverse | mRNA in-situ hybridization (cDNA isolated from cv. Bonus )     | GTGCGTACTACATTCTCGAG     | 60.5  | -    | -     |
| TtBH-A1        | Forward | tetraploid wheat TILLING screen                                | GCTAGGCGGGAGCAGTAGTA     | 60.82 | 1011 |       |
| TtBH-A1        | Reverse | tetraploid wheat TILLING screen                                | GTGGGCACAGCAGACCAC       | 60.98 | -    |       |
| TtBH-B1        | Forward | tetraploid wheat TILLING screen                                | TCCCCTCCCCTACCCAAG       | 59.21 | 1218 |       |
| TtBH-B1        | Reverse | tetraploid wheat TILLING screen                                | TGAGTACGTAAGAGGCTAAGATCG | 59.49 | -    |       |
| TILL_FZP_7_rev | Forward | Barley TILLING screen                                          | CAGTGGGAGAGGAAGCTGAA     | 60.5  | 1044 |       |
| TILL_FZP_7_for | Reverse | Barley TILLING screen                                          | GAAGCTCACAGCAACCACCT     | 60.5  | -    |       |

Available for download as Excel files at [www.genetics.org/lookup/suppl/doi:10.1534/genetics.115.176628/-/DC1](http://www.genetics.org/lookup/suppl/doi:10.1534/genetics.115.176628/-/DC1)

**Table S7** TILLING analysis in wheat

**File S1** Detailed information of the up and down regulated genes in microarray experiment.

File S2: SI TEXT

**Candidate gene specific marker development in barley and tetraploid wheat**

The orthologs of maize *BD1* and rice *FZP/BFL1* (CHUCK *et al.* 2002; KOMATSU *et al.* 2003; ZHU *et al.* 2003) were considered as candidate genes underlying *bh<sup>t</sup>* and *com2.g* phenotypes in wheat and barley, respectively. To map the barley ortholog, the *COM2* gene, in barley the corresponding specific gene-based markers were developed. The two CAPS markers (table below) are both on the basis of SNP A873G found between the two parents of the population (Haruna Nijo x BW 192 *com2.g*). Barley marker information is provided in the table below. Each of the two markers could be utilized for mapping.

| primer name  | orientation | primer seq               | Restriction Enzyme | Product size | Digested Product size_wild | Digested Product size_mutant | Digested Product size_heterozygote      | Tm (°C) |
|--------------|-------------|--------------------------|--------------------|--------------|----------------------------|------------------------------|-----------------------------------------|---------|
| HN_SNP2for   | Forward     | AACTCCGGGT<br>ACCTGAGCA  | BtgZI              | 327 bp       | 219 bp;<br>108 bp          | 327 bp                       | 327 bp; 215 bp;<br>112 bp               | 60,66   |
| HN_SNP2rev   | Reverse     | CAGATCGGCC<br>ATTAAGTGAG |                    |              |                            |                              |                                         | 58,33   |
| GW_3UTR_For3 | Forward     | GAGGACGTG<br>GACGACCTG   | Hpy99I             | 207 bp       | 10bp;<br>31bp;<br>168 bp   | 10bp; 31bp; 59<br>bp; 108 bp | 10bp; 31bp; 59<br>bp; 108 bp; 168<br>bp | 57,7    |
| HN_SNP2rev   | Reverse     | CAGATCGGCC<br>ATTAAGTGAG |                    |              |                            |                              |                                         | 58,33   |

Wheat marker information for the candidate gene underlying *bh<sup>t</sup>* is presented in the following table and exemplary image. This CAPS marker is developed on the basis of SNP T287C found between parents of the corresponding mapping populations. Two-step PCR reactions were followed. In the first round, any of the A genome specific primers 1 or 2 could be used. Second, the internal primer pair (TdFZP2A\_in\_F and TdFZP2A\_in\_R) was used to amplify a short fragment using the first round PCR product as template. This short fragment was used for CAPS marker development. At the image below, amplification of the candidate gene using genome-specific primers (left), amplification of region of interest using internal primers (middle), and digestion analysis (right) are depicted.

| primer name        | Product ID                         | primer seq                | Restriction Enzyme | Product size | Digested Product size_wild | Digested Product size_mutant | Digested Product size_heterozygote |
|--------------------|------------------------------------|---------------------------|--------------------|--------------|----------------------------|------------------------------|------------------------------------|
| Tafzp_2A_Forward 1 | A genome specific 1                | AGCCAACCTCA<br>CTTCACTTC  | -                  | 946 bp       | 946 bp                     | 946 bp                       | 946 bp                             |
| Tafzp_2A_Reverse 1 |                                    | GAGCAATGCCA<br>GCGCGTCCGT |                    |              |                            |                              |                                    |
| Tafzp_2A_Forward 2 | A genome specific 2                | CTAGGCGGGA<br>GCAGTAGTA   | -                  | 963 bp       | 963 bp                     | 963 bp                       | 963 bp                             |
| Tafzp_2A_Reverse 2 |                                    | AGCGCGTCCGT<br>TTCAGTGG   |                    |              |                            |                              |                                    |
| TdFZP2A_in_F       | Internal for A.G. Specific 1 and 2 | GACCCGACCAC<br>CAAGGAG    | BstNI              | 147 bp       | 61 bp; 86<br>bp            | 147 bp                       | 61 bp; 86 bp;<br>147 bp            |
| TdFZP2A_in_R       |                                    | GTAGTTGTTGT<br>AGGCGGCCGT |                    |              |                            |                              |                                    |

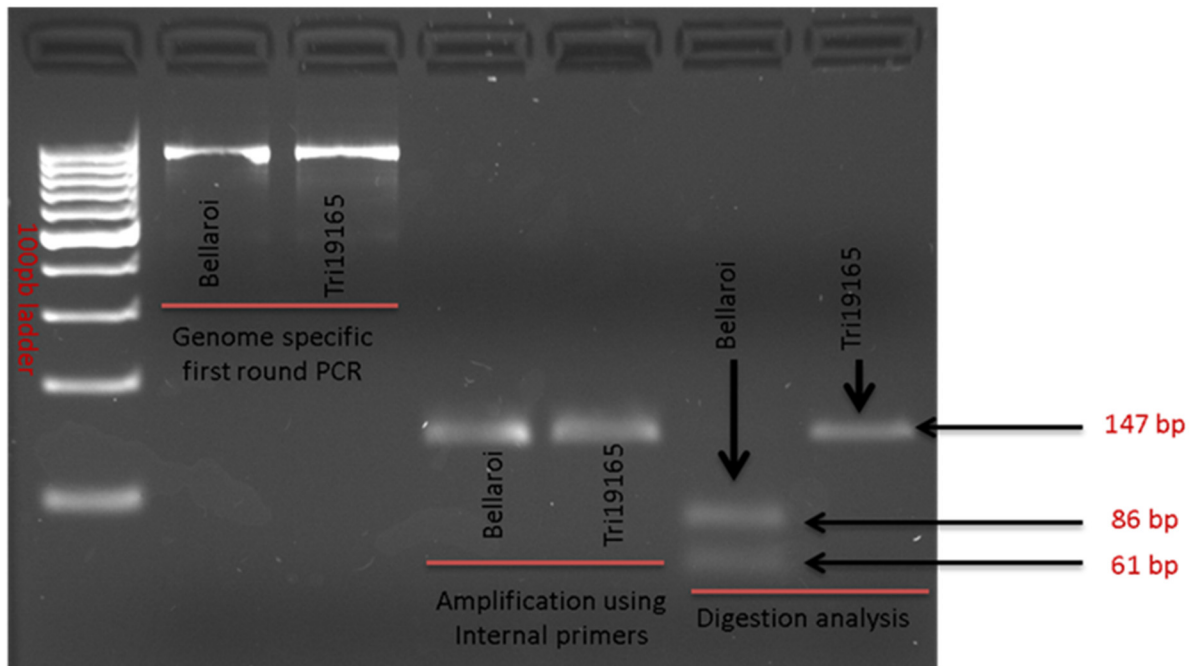

### Genetic mapping in barley

To newly map the phenotype in barley, we developed an  $F_2$  mapping population comprising 286 individuals between the parental mutant BW 192 *com2.g* and barley cv. Haruna Nijo. The parental mutant BW 192 *com2.g* is the Bowman Near Isogenic Line of *com2.g* and was previously developed until  $BC7_{\leq}$  generation (DRUKA *et al.* 2010). The segregation pattern of the phenotype among the corresponding  $F_2$  barley plants fitted well with a 3:1 ratio typical for a monogenic recessive trait. The syntenic information reported in the form of barley chromosome 2H Genome Zipper (MAYER *et al.* 2011) was explored to genetically localize the phenotype and to develop further markers surrounding the locus (Figure S2). This low resolution genetic mapping localized the *com2.g* phenotype in an interval of 5.5 cM along the barley chromosome 2H short arm. The interval was flanked by two barley gene based markers orthologous of rice genes Os07g0673700 (barley CAPS marker *com2\_p11/com2\_p12*) and Os07g0668900 (barley CAPS marker *com2\_p19/com2\_p20*), respectively. The two aforementioned flanking markers were used for screening a larger population consisting of 1750  $F_2$  plants from which 52 recombinant plants were identified.

While fine-mapping *com2.g*, we discovered that the observed genotypic alleles for the *COM2*-specific marker failed to fully match the *com2.g* phenotypic score since six out of the 52  $F_2$  recombinants showed a discrepant phenotype. While genotypically heterozygous for *COM2*, they showed the supposedly recessive branched phenotype.  $F_3$  offsprings (17 to 28

progenies per F<sub>2</sub> totaling 128 F<sub>3</sub> plants) segregated for the respective spike-branching phenotype at both phenotypic and genotypic levels thus confirming the heterozygosity of the parental F<sub>2</sub> plants. However, also F<sub>3</sub> plants showed inconsistencies between genotypic and phenotypic data. While all 36 genotypically homozygous mutant plants showed clear spike-branching, 33 of the 70 heterozygous and three out of 22 homozygous wild type plants showed a faintly branched spike. The deviant F<sub>3</sub> plants were progenies from three out of six F<sub>2</sub> plants which suggest that additional genetic and/or environmental factors regulate spike-branching. This is supported by observations in maize that found an effect of genotypic background on the expressivity of the inflorescence branching (COLOMBO *et al.* 1998).

#### ***Genetic mapping in tetraploid wheat***

A linkage map for *bh<sup>t</sup>* in tetraploid wheat was established in parallel to genetic mapping of *com2.g* in barley. Two different mapping populations consisting of 279 and 159 F<sub>2</sub> plants were developed using a set of published microsatellite markers (RODER *et al.* 1998) (Figure S2), the phenotype could be genetically mapped to a region spanning ~20 cM on wheat chromosome 2A short arm (2AS) (Figure S2) that confirmed the previous finding of *bh<sup>t</sup>* genetic mapping (KLINDWORTH *et al.* 1997). Both mutant parents TRI 27966 and TRI 19165 carry the same recessive allele of *bh<sup>t</sup>* showing only a single amino acid substitution of leucine to proline at position 96 (L96P) as compared to the wild type. However, further genetic mapping for positional cloning of the gene was not followed in wheat.

### **SI MATERIALS AND METHODS**

#### ***Marker development in barley***

Barley chromosome 2H genome zipper (GZ) (MAYER *et al.* 2011) was utilized for initial marker development. Barley sequence information, the homologs of the rice genes ordered along the 2H-GZ was used for primer design. Barley sequence information was obtained from IPK Barley Blast Server (<http://webblast.ipk-gatersleben.de/barley/viroblast.php>). Corresponding rice genes were extracted from respective genome browser server (<http://rice.plantbiology.msu.edu/cgi-bin/gbrowse/rice/>). Rice gene sequences were blasted against the IPK barley blast server (<http://webblast.ipk-gatersleben.de/barley/viroblast.php>) to obtain barley sequences. Sequences were amplified in parental lines of the mapping population using primers designed to detect SNP polymorphisms. Identified SNPs were converted to restriction enzyme based CAPS (<http://nc2.neb.com/NEBcutter2/>). The barley ortholog of rice *FZP/BFL1* gene sequence (*Os07g0669500*) was used for candidate gene marker development. In case of wheat, publicly available SSR markers (RODER *et al.* 1998) were used for genetic mapping.

## TILLING analysis

### Barley

For identifying further mutant alleles of *COM2* in barley, a TILLING population consisting of 10,279 EMS (Ethyl methanesulfonate) treated plants of cv. Barke was screened. A primer combination (Table S6) was used to amplify the single exon of the *COM2* gene. The product was subjected to standard procedure of AdvanCE™ TILLING kit as described in (GAWRONSKI *et al.* 2014). Amplified products were digested with dsDNA cleavage kit followed by analysis via mutation discovery kit and gel - dsDNA reagent kit. These were performed on the AdvanCE™ FS96 system according to manufacturer's guidelines (advanced analytical, IA, USA). Amplified ORF was also re-sequenced by Sanger sequencing on all accessions carrying polymorphism identified to confirm SNPs. In addition to the Barke population, a different TILLING population, TillMore (in the cv. Morex) (TALAME *et al.* 2008) was also screened for additional mutant alleles of *COM2*. A set of TillMore lines with branched phenotype was screened. From these lines, the *COM2* single exon was re-sequenced for detection of causal SNPs.

### Wheat

To identify *TtBH-1* mutants in wheat, a tetraploid TILLING population consisting of 1,139 EMS plants of cv. Kronos was screened (Uauy *et al.* 2009). Homoeologue-specific primers were designed (Table S6) and tested for specificity; betaine was added at 1M final concentration to the PCR reactions. A 1,011 bp fragment of *TtBH-A1* and a 1,218 bp fragment of *TtBH-B1* were screened. Mutant detection was performed with *Ce1* digestion followed by analysis on a capillary ABI3730 sequencer (Applied Biosystems, Foster City, California, USA) using published protocols (Le SIGNOR *et al.* 2009). Individual DNAs from positive pools were Sanger sequenced to identify the nature of the mutations.

### Haplotype analysis

Genomic DNA was extracted using mixed alkyl trimethyl ammonium bromide method (SALLAUD *et al.* 2003) from a diverse set of barley accessions (Table S3) using standard protocols and the full coding sequence of the barley *COM2* gene was PCR-amplified using primers **Ptp #56**: GCATGCATGTCACTCGAACT (upstream of ATG) and **Ptp #67**: CTAGGGCACCGAAACAAGCC (downstream of stop codon). PCR reactions (15 µL) contained 40-50 ng genomic DNA, 0.3 µM of each primer, dNPT mix 0.5 mM, DMSO 5%, herculase buffer 1x, Herculase Hotstart DNA polymerase 0.74 U (Stratagene #600310). Thermal cycling protocol consisted of: 1 cycle (95°/5'), 4 cycles (95°/20", 65°/10" [with 0.5°reduction per cycle], 72°/45"), 2 cycles (95°/20", 62°/20", 72°/45"), followed by 34 cycles (95°/20", 60°/30", 72°/1') and the last step of 1 cycle (72°/10'). PCR products were purified using the ExoSAP-IT (Exo-nucleases) PCR clean-up protocol (Applied Biosystems®) following the manufacturer's instructions and sequenced using the Sanger method with BigDye™ Terminator v3.1 Matrix Standard Sequencing Kit (Applied Biosystems®, ABI PRISM® 3700 DNA Analyzer) using primers **Ptp #56** and **Ptp #23** ACCAACTTCGTCTACGCGCA.



### Sequence annotation

Unpublished sequence information for the two BAC contigs (44575 and 47813; spanning the interval between M1 and M2) was made available from the international barley sequencing consortium (through Dr. Nils Stein). First, barley BAC contig overlap detection was performed by an all against-all alignment with megablast (ZHANG *et al.* 2000). This was to confirm the overlap between the two BAC contigs initially identified. The criteria were only BLAST hits longer than 2 kb and 99.5% sequence identity. Sequence annotation was performed as described by (MASCHER *et al.* 2014). Sequences were first subjected to k-mer-based repeat masking using Kmasker algorithm (SCHMUTZER *et al.* 2014). *Augustus* was implemented for structural gene annotation of repeat-masked contigs using the maize model. Finally, predicted protein sequences were functionally annotated with the AHRD pipeline. This included parsing the description of BLASTP hits against the TAIR, Uniprot/trEMBL, and Uniprot/SwissProt databases as utilized by (ZHANG *et al.* 2000). Genes annotated as unknown proteins or transposable elements were excluded from further analysis.

**File S3** TtBH and COM2 DNA sequence

Available for download at [www.genetics.org/lookup/suppl/doi:10.1534/genetics.115.176628/-/DC1](http://www.genetics.org/lookup/suppl/doi:10.1534/genetics.115.176628/-/DC1)

## REFERENCES

- Chuck, G., M. Muszynski, E. Kellogg, S. Hake and R. J. Schmidt, 2002 The control of spikelet meristem identity by the *branched silkless1* gene in maize. *Science* 298: 1238-1241.
- Colombo, L., G. Marziani, S. Masiero, P. E. Wittich, R. J. Schmidt *et al.*, 1998 *BRANCHED SILKLESS* mediates the transition from spikelet to floral meristem during *Zea mays* ear development. *Plant Journal* 16: 355-363.
- Druka, A., J. Franckowiak, U. Lundqvist, N. Bonar, J. Alexander *et al.*, 2010 Exploiting induced variation to dissect quantitative traits in barley. *Biochemical Society Transactions* 38: 683-688.
- Gawronski, P., R. Ariyadasa, A. Himmelbach, N. Poursarebani, B. Kilian *et al.*, 2014 A distorted circadian clock causes early flowering and temperature-dependent variation in spike development in the *Eps-3A<sup>m</sup>* mutant of einkorn wheat. *Genetics* 196: 1253-1261.
- Klindworth, D. L., M. M. Klindworth and N. D. Williams, 1997 Telosomic mapping of four genetic markers in durum wheat. *Journal of Heredity* 88: 229-232.
- Komatsu, M., A. Chujo, Y. Nagato, K. Shimamoto and J. Kyojuka, 2003 *FRIZZY PANICLE* is required to prevent the formation of axillary meristems and to establish floral meristem identity in rice spikelets. *Development* 130: 3841-3850.
- Le Signor, C., V. Savoio, G. Aubert, J. Verdier, M. Nicolas *et al.*, 2009 Optimizing TILLING populations for reverse genetics in *Medicago truncatula*. *Plant Biotechnol J* 7: 430-441.
- Mascher, M., M. Jost, J. E. Kuon, A. Himmelbach, A. Assfalg *et al.*, 2014 Mapping-by-sequencing accelerates forward genetics in barley. *Genome Biol* 15: R78.
- Mayer, K. F. X., M. Martis, P. E. Hedley, H. Simkova, H. Liu *et al.*, 2011 Unlocking the barley genome by chromosomal and comparative genomics. *Plant Cell* 23: 1249-1263.
- Roder, M. S., V. Korzun, K. Wendehake, J. Plaschke, M. H. Tixier *et al.*, 1998 A microsatellite map of wheat. *Genetics* 149: 2007-2023.
- Sallaud, C., D. Meynard, J. van Boxtel, C. Gay, M. Bes *et al.*, 2003 Highly efficient production and characterization of T-DNA plants for rice (*Oryza sativa* L.) functional genomics. *Theor Appl Genet* 106: 1396-1408.
- Schmutzer, T., L. Ma, N. Pousarebani, F. Bull, N. Stein *et al.*, 2014 Kmasker – a tool for in silico prediction of single-copy FISH probes for the large-genome species *Hordeum vulgare*. *Cytogenetic and Genome Research* 142: 66-78.
- Talame, V., R. Bovina, M. C. Sanguinetti, R. Tuberosa, U. Lundqvist *et al.*, 2008 TILLMore, a resource for the discovery of chemically induced mutants in barley. *Plant Biotechnol J* 6: 477-485.
- Uauy, C., F. Paraiso, P. Colasuonno, R. K. Tran, H. Tsai *et al.*, 2009 A modified TILLING approach to detect induced mutations in tetraploid and hexaploid wheat. *BMC Plant Biol* 9: 115.
- Zhang, Z., S. Schwartz, L. Wagner and W. Miller, 2000 A greedy algorithm for aligning DNA sequences. *J Comput Biol* 7: 203-214.
- Zhu, Q. H., M. S. Hoque, E. S. Dennis and N. M. Upadhyaya, 2003 Ds tagging of *BRANCHED FLORETLESS 1 (BFL1)* that mediates the transition from spikelet to floret meristem in rice (*Oryza sativa* L.). *BMC Plant Biol* 3: 6.
