# Supplementary material
Source: PubMed Central journal article supplement (PMC4566260)
Supplement: 10.1534_115.176628_genetics.115.176628-17.pdf [file 10.1534_115.176628_genetics.115.176628-17.pdf]

**Table S6 Primer information**

| PrimerID       | Orien-tation | Experiment                                                      | Sequence                    | Tm (°C) | PCR product_b p | Restriction enzyme for CAPS marker developme nt |
|----------------|--------------|-----------------------------------------------------------------|-----------------------------|---------|-----------------|-------------------------------------------------|
| HvCOM2         | Forwar d     | qRT-PCR                                                         | CGCACATTGGGTCGTACCA         | 57.9    | 107             | -                                               |
| HvCOM2         | Revers e     | qRT-PCR                                                         | GTGATCGGCGCATTGG            | 57.2    | -               | -                                               |
| HvCKX2         | Forwar d     | qRT-PCR                                                         | GTTCTGGAGCGGAAGAGGAA G      | 60      | 107             | -                                               |
| HvCKX2         | Revers e     | qRT-PCR                                                         | CGGGGCCAATCGATTAACCTTCGT G  | 60      | -               | -                                               |
| HvBAS1         | Forwar d     | qRT-PCR                                                         | AGACGCCAGATCATCACCTGTG      | 59.1    | 101             | -                                               |
| HvBAS1         | Revers e     | qRT-PCR                                                         | ACATGGTCATTTCCGGCTGTCAT     | 62.9    | -               | -                                               |
| HvIDS1         | Forwar d     | qRT-PCR                                                         | CTAGCTCTCTGCTTACTCCCATG GAC | 60      | 134             | -                                               |
| HvIDS1         | Revers e     | qRT-PCR                                                         | CATGGCTCGGCAATGTTATCTCT CTC | 59.2    | -               | -                                               |
| HvASK2         | Forwar d     | qRT-PCR                                                         | GGTTGACTCTGCGACGCGA         | 60.3    | 76              | -                                               |
| HvASK2         | Revers e     | qRT-PCR                                                         | CGTTAACGGCTGCTCCCAGG        | 60.9    | -               | -                                               |
| HvCYP78A9      | Forwar d     | qRT-PCR                                                         | CCCATTGCGCCTAAACGCGA        | 60.4    | 96              | -                                               |
| HvCYP78A9      | Revers e     | qRT-PCR                                                         | AGAAACGTACAGCAGCCAGCC       | 60.1    | -               | -                                               |
| HvCRC          | Forwar d     | qRT-PCR                                                         | ATGGATGTGCTCCTGGGTGTG       | 59.7    | 82              | -                                               |
| HvCRC          | Revers e     | qRT-PCR                                                         | TGATGTCCCAGGTGGATGATCG      | 59.1    | -               | -                                               |
| HvLUX1         | Forwar d     | qRT-PCR                                                         | CAGAGTTGCAGAGAGTGTGTGC      | 58.6    | 107             | -                                               |
| HvLUX1         | Revers e     | qRT-PCR                                                         | TCTTGCCACTGCCAAAATGG        | 58.1    | -               | -                                               |
| HvRECTA        | Forwar d     | qRT-PCR                                                         | TGAAGTCGAATGGGCTGACCG       | 59.6    | 66              | -                                               |
| HvRECTA        | Revers e     | qRT-PCR                                                         | GCGTCTTAATCGACGAGCAGTCC     | 59.7    | -               | -                                               |
| HvTASSELSEE D2 | Forwar d     | qRT-PCR                                                         | ACTGCGCCTAGTTGTTTCGAG       | 57.4    | 97              | -                                               |
| HvTASSELSEE D2 | Revers e     | qRT-PCR                                                         | TCCTGCACACTCAAACCACA        | 57.1    | -               | -                                               |
| com2_p11       | Forwar d     | ForRecombinantScreen_dis tal proximal(ortholog of Os07g0673700) | CCCTTCCTCGTTAGGTACGTGTG     | 66      | 1147            | HpaII                                           |
| com2_p12       | Revers e     | ForRecombinantScreen_dis tal proximal(ortholog of Os07g0673700) | CTGGTGATTTCCCAAACCTGAAG     | 63      | -               | -                                               |
| com2_p19       | Forwar d     | ForRecombinantScreen_fla nk proximal(ortholog of                | GTCAACACACCAACGGGTCTTC      | 64      | 968             | EcoRV                                           |

|                |         |                                                                |                          |       |      |       |
|----------------|---------|----------------------------------------------------------------|--------------------------|-------|------|-------|
|                |         | Os07g0668900)                                                  |                          |       |      |       |
| com2_p20       | Reverse | ForRecombinantScreen_flank proximal(ortholog of Os07g0668900)  | AGGCCTATGGCATCATGGAAAT   | 60    | -    | -     |
| M1 (com2g_p31) | Forward | Flank marker M1 (morex_contig_1566969 CAJW011566969 carma=2HS) | CGCTACTTGGCACATTCTCA     | 60    | 1041 | Hinfl |
| M1 (com2g_p32) | Reverse | Flank marker M1 (morex_contig_1566969 CAJW011566969 carma=2HS) | CAGTTAGCTTTCGGGCTTTG     | 60    | -    | -     |
| M2 (2HS_3D)    | Forward | Flank marker M2 (ortholog of Os07g0669200)                     | GATCCACCTCCAGTAACGA      | 60    | 1061 | BsmI  |
| M2 (2HS_3D)    | Reverse | Flank marker M2 (ortholog of Os07g0669200)                     | GATGCACTGCCTCAACTCAA     | 60    | -    | -     |
| Insitu         | Forward | mRNA in-situ hybridization (cDNA isolated from cv. Bonus )     | CAACGGCTACTCACCTTCA      | 60.5  | 444  | -     |
| Insitu         | Reverse | mRNA in-situ hybridization (cDNA isolated from cv. Bonus )     | GTGCGTACTACATTCTCGAG     | 60.5  | -    | -     |
| TtBH-A1        | Forward | tetraploid wheat TILLING screen                                | GCTAGGCGGGAGCAGTAGTA     | 60.82 | 1011 |       |
| TtBH-A1        | Reverse | tetraploid wheat TILLING screen                                | GTGGGCACAGCAGACCAC       | 60.98 | -    |       |
| TtBH-B1        | Forward | tetraploid wheat TILLING screen                                | TCCCCTCCCCTACCCAAG       | 59.21 | 1218 |       |
| TtBH-B1        | Reverse | tetraploid wheat TILLING screen                                | TGAGTACGTAAGAGGCTAAGATCG | 59.49 | -    |       |
| TILL_FZP_7_rev | Forward | Barley TILLING screen                                          | CAGTGGGAGAGGAAGCTGAA     | 60.5  | 1044 |       |
| TILL_FZP_7_for | Reverse | Barley TILLING screen                                          | GAAGCTCACAGCAACCACCT     | 60.5  | -    |       |
